1 **Title: Sucrose transport and metabolism control carbon partitioning between stem and**  
2 **grain in rice**

3  
4

5 **Running Title:** Source-sink relationship in cultivated and wild rice

6  
7

8 Jyotirmaya Mathan, Anuradha Singh, Aashish Ranjan\*

9 National Institute of Plant Genome Research, Aruna Asaf Ali Marg, New Delhi-110067,  
10 India.

11

12 **\*Corresponding Author**

13 **e-mail:** [aranjan@nipgr.ac.in](mailto:aranjan@nipgr.ac.in)

14 Phone no. +91-11-26735117

15

16 Authors' email

17 Jyotirmaya Mathan: [jyotirmaya@nipgr.ac.in](mailto:jyotirmaya@nipgr.ac.in)

18 Anuradha Singh: [annusingh1206@gmail.com](mailto:annusingh1206@gmail.com)

19

20 Date of submission: 19<sup>th</sup> October 2020

21

22

23 Number of figures: 7 figures

24

25

26 The word count: 6,089

27

28

29 Supplementary data: 13 supplementary figures and 1 supplementary table

30

31

32

33

34

35 **Title: Sucrose transport and metabolism control carbon partitioning between stem and**  
36 **grain in rice**

37

38 **Running Title:** Source-sink relationship in cultivated and wild rice

39

40 **Highlight**

41 Vascular features, sucrose transport, and sugar metabolic enzyme activity contribute to the  
42 differential source-sink relationship between the selected cultivated and wild rice that differ  
43 in biomass and grain yield.

44

45 **Abstract**

46 The source-sink relationship is key to overall crop performance. Detailed understanding of  
47 the factors that determine source-sink dynamics is imperative for the balance of biomass and  
48 grain yield in crop plants. We investigated the differences in the source-sink relationship  
49 between a cultivated rice *Oryza sativa* cv. Nipponbare and a wild rice *Oryza australiensis*  
50 that show striking differences in biomass and grain yield. *Oryza australiensis*, accumulating  
51 higher biomass, not only showed higher photosynthesis per unit leaf area but also exported  
52 more sucrose from leaves than Nipponbare. However, grain features and sugar levels  
53 suggested limited sucrose mobilization to the grains in the wild rice due to vasculature and  
54 sucrose transporter functions. Low cell wall invertase activity and high sucrose synthase  
55 cleavage activity followed by higher expression of cellulose synthase genes in *Oryza*  
56 *australiensis* stem utilized photosynthates preferentially for the synthesis of structural  
57 carbohydrates, resulting in high biomass. In contrast, the source-sink relationship favored  
58 high grain yield in Nipponbare via accumulation of transitory starch in the stem, due to  
59 higher expression of starch biosynthetic genes, which is mobilized to panicles at the grain  
60 filling stage. Thus, vascular features, sucrose transport, and functions of sugar metabolic  
61 enzymes explained the differences in the source-sink relationship between Nipponbare and  
62 *Oryza australiensis*.

63

64 **Keywords:** Biomass; Grain yield; Photosynthesis; Source-sink relationship; Starch;  
65 Structural carbohydrates; Sucrose synthase; Sucrose transport; Vascular features

66

67

68

69

## 70 **Introduction**

71 Source-sink relationship is critical for determining the overall growth and  
72 performance of crop plants (White *et al.*, 2016). Photosynthetic carbon assimilation in source  
73 leaves, sucrose transport through the vasculature, type and strength of sink tissues, as well as  
74 the metabolic status of the tissues are the key features that determine the source-sink  
75 dynamics of a plant. Photosynthetic leaves are the major source tissues of a plant, whereas  
76 types and strength of sink organs vary depending upon the growth stages and environmental  
77 conditions. For example, grains are the primary sink in the reproductive stage of crop plants,  
78 while roots, stem/internodes, and growing leaves function as the sink in the vegetative stage.  
79 Natural genetic variation for differences in the source-sink dynamics, resulting in changes in  
80 biomass and yield, has been evident (Yin *et al.*, 2009; Burnett *et al.*, 2016; White *et al.*, 2016;  
81 Fabre *et al.*, 2020). For example, many of the wild relatives of rice accumulate high biomass  
82 with poor grain filling, whereas cultivated varieties produce higher grain yield (Sanchez *et al.*,  
83 *et al.*, 2013).

84 Leaf morphological and anatomical features along with photosynthesis per unit leaf  
85 area largely determine the source strength of a plant (Mathan *et al.*, 2016). Functions of the  
86 key carbohydrate metabolic enzymes, such as ADP-glucose pyrophosphorylase (AGPase),  
87 sucrose phosphate synthase (SPS), sucrose phosphate phosphatase (SPP), and sucrose  
88 synthase (SUS), are known to be key determinants of the metabolic status of source leaves  
89 (Osorio *et al.*, 2014; Ruan, 2014). Similarly, the capacity to utilize photosynthates towards  
90 storage and maintenance largely determines the sink strength. Sink size, influenced by tiller  
91 number, spikelet number per panicle, and seed size; and sink activity, determined by  
92 functions of various metabolic enzymes such as cell wall invertase (cwINV) and sucrose  
93 synthase (SUS), dictate the photosynthates utilization at a sink organ (Smith *et al.*, 2018;  
94 Stein and Granot, 2019). Photosynthates are primarily partitioned from source leaves to  
95 different sink tissues in the form of sucrose via phloem with the aid of SWEET and SUT  
96 transporters (Braun, 2012; Chen *et al.*, 2012; Julius *et al.*, 2017). Mutations or  
97 overexpression of genes encoding sucrose transporters affect plant yield and biomass via  
98 modulation of source-sink dynamics (Scofield *et al.*, 2002; Chen *et al.*, 2012; Yang *et al.*,  
99 2018). Besides the sucrose transporter functions, vascular features not only determine the rate  
100 of sucrose export from leaf tissues to phloem sap but also control mobilization of  
101 photosynthates to the panicles at the reproductive stage (Qi *et al.*, 2008; Fujita *et al.*, 2013;  
102 Sack and Scoffoni, 2013).

103           Photosynthates assimilated in leaves are either used to meet immediate cellular needs  
104 or mobilized into different sinks. Starch stored in leaves during the day is degraded during the  
105 night to be transported to different sink organs for growth (Smith and Stitt, 2007; Chen *et al.*,  
106 2012). Mutants defective in sucrose transport, usually, accumulate starch in leaves at the end  
107 of the night, limiting plant growth (Chen *et al.*, 2012). The utilization and storage of sugars  
108 are regulated diurnally as well as developmentally. Stem serves as the main storage organ for  
109 carbohydrates in crop plants, including rice, during vegetative growth. Sucrose, after getting  
110 unloaded into the stem, could possibly be converted to different non-structural carbohydrates  
111 (NSCs), such as glucose, fructose, and starch. Starch is reported to be the major storage form  
112 in rice stem during the vegetative stage, which is mobilized to developing grains with the  
113 onset of the reproductive stage, contributing up to half of the final grain yield (Wang *et al.*,  
114 2017). A portion of the photosynthates is also used as a structural component of the cell wall  
115 for the growth and development of new organs as well as elongation and thickening of  
116 existing organs. High biomass accumulation is usually associated with the accumulation of  
117 cellulose and other structural carbohydrates in crop plants, with cellulose alone contributing  
118 around 25-50% of plant biomass (Haigler *et al.*, 2001). Thus, the balance of structural and  
119 non-structural carbohydrates derived from the sucrose in the stem is critical for determining  
120 biomass and grain yield in cereal crops.

121           Sucrose, after reaching the stem, is hydrolysed by two classes of enzymes, invertases  
122 (INV) and sucrose synthase (SUS). INV cleaves sucrose into glucose and fructose, while  
123 SUS reversibly catalyses the formation of UDP-glucose and fructose. The UDP-glucose,  
124 generated by the cleavage activity of SUS, is used as a precursor for cellulose synthesis.  
125 Further, UDP-glucose can be converted to ADP-glucose for usage in starch synthesis, making  
126 SUS a key enzyme for biomass and grain yield (Smith *et al.*, 2012; Ruan, 2014; Stein and  
127 Granot, 2019). The functions of SUS are important for phloem loading and unloading as well  
128 as for determining sink strength (Smith *et al.*, 2012; Fan *et al.*, 2017; Yao *et al.*, 2020).  
129 Among the seven genes encoding SUS enzymes in rice, *OsSUS1* and *OsSUS3* contribute to  
130 seed starch biosynthesis (Cho *et al.*, 2011). Higher expression of *OsSUS3* also led to  
131 increased levels of structural carbohydrates, cellulose and hemicellulose, in rice (Fan *et al.*,  
132 2017). *OsSUS1* is highly expressed in rice internodes, with a strong correlation with the  
133 expression pattern of genes encoding cellulose synthases, *OsCES4*, *OsCES7*, and *OsCES9*  
134 (Hirose *et al.*, 2008; Guevara *et al.*, 2014). *OsCES4*, *OsCES7*, and *OsCES9* enzymes have  
135 been reported to function in secondary cell wall formation (Tanaka *et al.*, 2003; Wang *et al.*,

136 2016). Thus, functions of enzymes, such as INV, SUS, and CES, are important for  
137 determining source-sink dynamics for biomass and grain yield.

138 Despite the key importance of sucrose partitioning and metabolism in determining the  
139 source-sink relationship, this aspect is largely unexplored for optimization of grain yield and  
140 biomass in rice. Cultivated rice varieties and their wild relatives, with striking differences in  
141 yield and biomass traits, provide an excellent system to investigate the mechanistic basis of  
142 the source-sink relationship. Comparative characterization of source and sink features along  
143 with physiological and biochemical attributes for the selected wild and cultivated rice, which  
144 differ in grain yield and biomass traits, might provide key information related to bottlenecks  
145 for higher grain yield. In addition, such a study would also underline the factors contributing  
146 to high biomass in wild rice. The knowledge can be utilized for streamlining the sucrose  
147 transport and metabolism towards optimizing source-sink dynamics for higher yield and/or  
148 biomass. Here, we investigated the limitations related to sucrose transport and metabolism for  
149 grain yield in wild rice *O. australiensis*, resulting in higher biomass, compared to the  
150 cultivated variety *O. sativa* cv. Nipponbare. We report that a higher accumulation of  
151 structural carbohydrates, cellulose and hemicellulose, in *O. australiensis* is due to lower cell  
152 wall invertase activity and higher SUS cleavage activity together with higher expression of  
153 genes encoding cellulose synthases. Cultivated rice Nipponbare, in contrast, accumulated  
154 more starch in the stem due to higher expression of genes encoding starch biosynthesis  
155 enzymes. We also established the contribution of specific sucrose transporters and vascular  
156 features towards limited mobilization of photosynthates to *O. australiensis* panicles. Results  
157 from additional cultivated and wild rice accessions, *O. sativa* cv. IR 64 and *O. latifolia*,  
158 further corroborated our model.

159

## 160 **Materials and methods**

### 161 **Phenotyping of the selected rice accessions for biomass and yield-related traits**

162 Two cultivated varieties, *Oryza sativa* ssp. *indica* cv. IR 64 and *Oryza sativa* ssp. *japonica*  
163 cv. Nipponbare, and three wild rice species, *Oryza rufipogon* (IRGC 99562), *Oryza latifolia*  
164 (IRGC 99596), and *Oryza australiensis* (IRGC 105272) were investigated for the study.  
165 Seeds were germinated on the germination paper in a petri dish for 5-7 days. Germinated  
166 seedlings were grown in half-strength Yoshida media for two weeks, and then transplanted in  
167 the experimental field of National Institute of Plant Genome Research, New Delhi  
168 (latitude 28°36 N; longitude 77°12 E; altitude 216 m). Plants were grown under natural  
169 growing conditions with average air temperature >30°C, 70-80% humidity, and more than

170 100 cm annual rainfall. All the phenotyping was performed after the transition to the  
171 reproductive stage. At least ten individual plants of each genotype were used for  
172 phenotyping. Plant architectural traits were quantified at the milk-stage of grain-filling. Seed  
173 traits and fresh and dry weight were quantified at the grain maturity stage. Plant height was  
174 measured as the height from the soil surface to the tip of the central panicle; total leaves per  
175 plant, tiller number per plant, and internode number per main stem were counted manually;  
176 and internode length was calculated using the distance between two consecutive nodes on the  
177 main stem. Leaf surface area was quantified for fully expanded top four leaves, including flag  
178 leaf, using a portable leaf area meter (LI-3000C, LI-COR Biosciences). Stem thickness and  
179 stem circumference were quantified from images of hand-cut sections of the main stem using  
180 Fiji-Image J software (Schindelin *et al.*, 2012). Fresh weight was quantified by directly  
181 weighing the entire plant mass, and dry weight was quantified by weighing the dried plant  
182 mass after drying the entire plant mass at 60°C for five days. The number of spikelets per  
183 panicle was counted manually. For grain weight analysis, 1000-grains were randomly  
184 selected and weighed using an electronic balance. For grain yield per plant, physiologically  
185 dried grains per plant were harvested and weighed. Raw data of biomass and yield-related  
186 traits for each genotype were normalized to the median, followed by log base 2  
187 transformation for principal component analysis using JMP software from SAS  
188 ([https://www.jmp.com/en\\_us/home.html](https://www.jmp.com/en_us/home.html)).

189

#### 190 **Quantification of leaf photosynthesis rate and related physiological traits**

191 Leaf photosynthesis rate ( $A$ ), stomatal conductance ( $g_s$ ), and intercellular CO<sub>2</sub> concentration  
192 ( $C_i$ ) were recorded from flag leaves at booting, milk- and dough- stage of grain filling for *O.*  
193 *sativa* ssp. *japonica* cv. Nipponbare and *O. australiensis* using a portable photosynthesis  
194 system LI-6400XT (LI-COR Biosciences).  $A$ ,  $g_s$ , and  $C_i$  were quantified from the flag leaf  
195 regions fully exposed to sunlight at the booting stage, as leaves were not fully expanded. The  
196 values were measured from the middle widest part of fully expanded flag leaves at the milk-  
197 and dough- stage of grain filling. Data were recorded from at least 15 independent plants of  
198 each genotype on a clear day between 9.00 h to 11.00 h at ambient CO<sub>2</sub> level ( $C_a$ ; 400  $\mu\text{mol}$   
199  $\text{mol}^{-1}$ ), photosynthetic photon flux density (PPFD, 1,500  $\mu\text{mol m}^{-2} \text{s}^{-1}$ ), 300  $\mu\text{mol s}^{-1}$  flow  
200 rate, and 70% relative humidity. During measurements, the leaf chamber air temperature was  
201 set at 30°C with maximum vapor pressure deficit in the range of 1.0-1.5 kPa.

202

#### 203 **Quantification of glucose, fructose, and sucrose**

204 The non-structural carbohydrates (NSCs: glucose, fructose, and sucrose) present in the flag  
205 leaf and stem were quantified at the milk-stage of grain-filling by Gas Chromatography-Mass  
206 Spectrometry (GC/MS). Flag leaves and stem tissues of both the genotypes were harvested  
207 from field-grown plants at 9:00-11:00 am. For the quantification of NSCs in flag leaves at the  
208 end of the day (EOD) and end of the night (EON), tissue samples were collected at 6.00 pm  
209 and 6.00 am, respectively. The tissues were sampled from at least four individual plants per  
210 genotype and immediately frozen into liquid nitrogen after harvesting. A 100 mg fresh weight  
211 (FW) of the tissues was extracted using 1.0 ml water: chloroform: methanol (1:1:2.5) spiked  
212 with 10  $\mu$ l internal standard (1 mg ml<sup>-1</sup> ribitol in water). The mixture was vortexed,  
213 centrifuged at 13,000 x g for 15 min., and 200  $\mu$ l of polar phase was dried for 3 hours in a  
214 speed-vac concentrator. Next, dried samples were derivatized with 50  $\mu$ l of 20 mg ml<sup>-1</sup>  
215 methoxyamine in pyridine warmed for 37°C for 120 mins with shaking. Metabolites were  
216 further derivatized by adding 70  $\mu$ l of N-methyl N-trimethylsilyl-trifluoroacetamide  
217 (MSTFA) at 37°C for 30 min. Once derivatization was completed, samples were transferred  
218 to GC compatible vials, and 1 $\mu$ l of samples was injected on GC-MS-QP2010 (Shimadzu) as  
219 described in Liseic *et al.* (2006). For metabolite identification, the mass spectra were matched  
220 with commercially available NIST spectral libraries, and the relative amount of the  
221 metabolites was calculated by the total ion current signal that was normalized to ribitol and  
222 tissue weight (Kim *et al.*, 2012; Mikaia *et al.*, 2014).

223

#### 224 **Starch quantification**

225 Starch was quantified from flag leaves, stems, different internodes, and mature seeds of the  
226 selected wild and cultivated accessions. The quantification of starch from flag leaves and  
227 stems was performed at the milk-stage of grain-filling at the time of phenotyping of  
228 photosynthesis. In addition, flag leaves samples were used for starch quantification at EOD  
229 and EON. Starch was also quantified from matured leaves at the vegetative and booting stage,  
230 as well as in different internodes of *O. sativa* ssp. *japonica* cv. Nipponbare and *O.*  
231 *australiensis* at the milk-stage of grain-filling. Starch was quantified using Mega-Calc Total  
232 starch determination kit (K-TSTA; Megazyme) according to the manufacturer's protocol.  
233 Four independent biological replicates were analysed for each tissue type per genotype.

234

#### 235 **<sup>14</sup>C labelled sucrose loading assay**

236 The phloem loading capacity of <sup>14</sup>C labelled sucrose was quantified following the method as  
237 described by Yadav *et al.* (2017). Briefly, rice flag leaves at the milk-stage of grain-filling

238 were cut, and the leaf bases were immediately transferred to petri-dish submerged with  
239 MES/CaCl<sub>2</sub> buffer (20 mM MES, 2mM CaCl<sub>2</sub>, pH 5.5 with KOH). Next, leaf discs (3.6 × 1.0  
240 cm) were excised using a cork borer, and immediately placed abaxial side down in a 24-well  
241 microtiter plate pre-filled with 1 ml MES/CaCl<sub>2</sub> buffer spiked with 1mM sucrose solution  
242 (1mM unlabelled sucrose supplemented with 0.81μCi ml<sup>-1</sup> <sup>14</sup>C Sucrose). Leaf discs immersed  
243 in the above solution were vacuum-infiltrated for at least 20 min with gentle shaking at room  
244 temperature. Labelled leaf discs were transferred to a fresh microtiter plate, washed twice  
245 with 1.0 ml MES/CaCl<sub>2</sub> buffer, blot dried on absorbent filter paper, immediately frozen on  
246 dry ice, and lyophilized. Next, <sup>14</sup>C sucrose loading capacity into leaves was quantified by a  
247 scintillation counter (PerkinElmer Inc.). Six biological replicates with four leaf discs each  
248 were used per genotype for the experiment.

249

#### 250 **Sucrose quantification in the phloem sap**

251 The amount of sucrose in the phloem was quantified using the EDTA-facilitated exudation  
252 technique described by King and Zeevaart (1974). Flag leaves of the cultivated and wild rice  
253 were excised at the milk-stage of grain-filling at around 9-10 am (when leaf photosynthesis  
254 was quantified). Leaf bases were immediately recut under exudation buffer (10 mM, Hepes,  
255 10 mM EDTA, pH 7.5) to allow dispersion of any leaf contaminants, and placed in a 15 ml  
256 tube containing 5 ml of the exudation buffer. Samples were incubated in a humid chamber  
257 (relative humidity > 90%) in the dark to prevent evapotranspiration, and exudates were  
258 collected after 5 h of incubation. 2 ml of sample aliquot was spiked with 50 μl internal  
259 standard (1 mg ml<sup>-1</sup> ribitol in water), and freeze-dried for sucrose quantification using GC-  
260 MS based method as described earlier. Individual flag leaves from different plants were  
261 considered as separate biological replicates, and four biological replicates were analyzed for  
262 each genotype.

263

#### 264 **RNA isolation, cDNA synthesis, and qRT-PCR analysis**

265 Tissue samples for RNA isolation and qRT-PCR analysis were collected from the same  
266 developmental stage of *O. sativa* ssp. *japonica* cv. Nipponbare and *O. australiensis*. Samples  
267 were collected at the milk-stage of grain filling (ten days after heading) for the two species  
268 from the same regions of flag leaves, stems, panicle bases, and spikelets. Total RNA from  
269 flag leaf, stem, and panicle base was extracted using TRIzol reagent (Invitrogen), whereas  
270 RNA from spikelet was extracted using plant RNA purification kit (Sigma-Aldrich)  
271 according to manufacturer's protocol. One microgram (1μg) of total RNA was reverse



272 transcribed to first strand-cDNA by anchored oligodT priming using Thermo Scientific  
273 RevertAid cDNA synthesis kit following manufacturer's instructions. The primer pairs  
274 (Table S1) of the selected target genes used in this study produced a single product as viewed  
275 through dissociation curve analysis. Further, the efficiency of each primer pair was also  
276 evaluated using a standard curve method where five cDNA quantities (1, 25, 50, 75, and 100  
277 ng) from each genotype were used to construct a standard curve, and efficiency was  
278 calculated using the formula  $E = (10^{[-1/\text{slope}] - 1}) * 100$ . Expression analysis of each gene was  
279 performed in three biological replicates for each genotype. The transcript levels of genes  
280 were normalized independently to two stable internal controls actin (LOC\_Os03g50885) and  
281 ubiquitin (LOC\_Os03g03920) with similar results. Relative expressions of target genes are  
282 presented using actin as the internal control applying  $2^{-\Delta Ct}$  method by Livak and Schmittgen  
283 (2001). *In silico* expression analysis of the genes was performed using OS\_AFFY\_RICE\_6  
284 dataset present in Genevestigator database (Hruz *et al.*, 2008; <https://genevestigator.com/>).

285

#### 286 **Visualization and quantification of anatomical traits**

287 The vascular features of flag leaves as well as vascular bundles in the inner and outer ring of  
288 the stem, and panicle base (0.5 cm above the panicle node) were visualized and quantified  
289 using hand-cut transverse sections. Flag leaves, stems, and panicle bases from five  
290 independent plants for each genotype were hand-sectioned using a razor-blade at the milk-  
291 stage of grain-filling, and stained with toluidine blue O (0.02% toluidine blue O in water) as  
292 described by Mitra and Loqué, (2014). Photographs were taken under a bright field  
293 microscope (LMI). Quantification of the different anatomical traits was made using Fiji-  
294 Image J software (Schindelin *et al.*, 2012).

295

#### 296 **Cellulose staining and quantification**

297 For histochemical visualisation of cellulose, transverse hand-sections of rice stem  
298 (approximately 20  $\mu\text{m}$  thickness) at the milk-stage of grain-filling were stained using  
299 calcofluor white (0.2% calcofluor white M2R in water) staining solution as described by  
300 Ambavaram *et al.* (2011). Stained sections were photographed under UV light range using a  
301 fluorescence microscope (excitation filter: 340-380 nm; Carl Zeiss Microscope). The  
302 quantification of cellulose and hemicellulose was made using National Renewable Energy  
303 Laboratory (NREL) protocols as described in Mund *et al.* (2016). The quantifications were  
304 made in four biological replications for each genotype.

305

306 **Extraction of stem tissues for quantification of sucrose metabolic enzyme activity**

307 The enzyme activity was performed in the stem tissues of *O. sativa* ssp. *japonica* cv.  
308 Nipponbare and *O. australiensis*. Tissue sample (100 mg fresh weight) was ground in liquid  
309 nitrogen, and homogenized in extraction buffer (50 mM HEPES/NaOH (pH 7.5), 7.5 mM  
310 MgCl<sub>2</sub>, 2 mM EDTA, 2% (w/v) PEG 8000, 2% (w/v) PVP and 5 mM DDT) at 4 °C. The  
311 homogenate was centrifuged for 1 min at ~16,000 × g, the pellet was discarded, and the crude  
312 extract was used for enzyme activity assay.

313

314 **Estimation of cell wall invertase activity**

315 Cell wall invertase activity was estimated as described in Tomlinson *et al.* (2004). 50 µl of  
316 crude enzyme extract was added to 150 µl assay mix, containing 0.1 M sucrose in 50 mM  
317 sodium acetate at pH 4.7, on ice. The assay reaction was incubated at 37°C for 30 min. The  
318 reaction was alkalized by the addition of 50 µl 1 M TRIS-HCl (pH 8.0), and then heated at  
319 85°C for 3 min. Two blanks were set up to measure acid hydrolysis of sucrose and  
320 endogenous glucose levels. The amount of released hexoses was measured enzymatically  
321 using Sucrose/D-Fructose/D-Glucose assay kit (Megazyme), and invertase activity was  
322 expressed as described in Nishanth *et al.* (2018).

323

324 **Estimation of sucrose synthase synthesis and cleavage activity**

325 To quantify OsSUS synthesis activity, 50 µl of crude extract was incubated with 20 mM  
326 HEPES/NaOH buffer (pH 7.5), 5 mM MgCl<sub>2</sub>, 20 mM KCl, 12 mM fructose, 0.4 mM  
327 phosphoenolpyruvate, 2 mM uridine diphosphate UDP-glucose, 20 U pyruvate kinase, 20 U  
328 lactate dehydrogenase, and 0.15 mM NADH in 1.0 ml final reaction volume. Similarly, to  
329 quantify OsSUS cleavage activity, 50 µl of crude extract was incubated with 20 mM  
330 HEPES/NaOH buffer (pH 7.5), 100 mM sucrose, 2 mM UDP, 2mM MgCl<sub>2</sub>, 0.005 UDP-  
331 glucose dehydrogenase, and 1.5 mM NAD<sup>+</sup> in 1.0 ml final reaction volume. The reaction  
332 mixture was mixed gently, and a decrease and an increase in absorbance were measured for  
333 synthesis and cleavage activity, respectively, at 340 nm continuously for 0 to 300 sec using a  
334 UV-Vis spectrophotometer. The OsSUS activity was calculated as µmol NADH oxidized  
335 (synthesis activity) and NAD<sup>+</sup> reduced (cleavage activity) per min per mg protein as  
336 described in Qazi *et al.* (2012).

337

338 **Subcellular localization of OsSUS1**

339 Full length of *OsSUS1* CDS without stop codon was cloned under constitutive 35S promoter  
340 with a C-terminal eYFP fusion into binary vector pEG10 (Earley *et al.*, 2006). The construct  
341 along with empty vector control was then, introduced into EHA105 strain of *Agrobacterium*  
342 *tumefaciens*. Each transformant was co-infiltrated with a plasma membrane-localized marker  
343 (PM-mCherry; Nelson *et al.*, 2007) into the leaves of *Nicotiana benthamiana*. Confocal laser  
344 scanning microscopy TCS SP5 (Leica Microsystems) was used to take the images with  
345 appropriate lasers.

346

## 347 **Results**

### 348 **Biomass and grain yield differences among the selected wild and cultivated rice** 349 **accessions**

350 We initiated the study with two cultivated rice varieties, *Oryza sativa* ssp. *japonica*  
351 cv. Nipponbare and *Oryza sativa* ssp. *indica* cv. IR 64, and three wild relatives of rice, *Oryza*  
352 *rufipogon*, *Oryza latifolia*, and *Oryza australiensis* that show remarkable variations in overall  
353 growth and architectural features at both vegetative and reproductive stages (Fig. 1A). All the  
354 selected wild rice species grew taller compared to the two cultivated varieties (Fig. 1B).  
355 Among all the accessions, *O. sativa* cv. Nipponbare produced the lowest number of total  
356 leaves, while *O. rufipogon* showed the highest number of leaves per plant (Fig. 1C). In  
357 addition, Nipponbare showed a significantly lower tiller number per plant compared to all the  
358 selected accessions (Supplementary Fig. S1B). Selected wild rice species had a larger leaf  
359 surface area compared to the cultivated varieties (Fig. 1D). We, then, quantified the number  
360 and length of internodes in the main stem, as internodes are important contributors to the  
361 biomass of a plant. Cultivated rice varieties had fewer, smaller, and slender internodes in the  
362 main stem compared to the wild accessions (Fig. 1E; and Supplementary Fig. S1A). In  
363 addition, stem thickness and circumference were also lower for Nipponbare and IR 64  
364 compared to all selected wild species (Supplementary Fig. S1C, D). Thus, plant architectural  
365 traits, such as height, branching, and internode features, as well as leaf traits attributed to the  
366 high biomass of the selected wild rice. Consistent with this, the selected wild rice also  
367 showed higher fresh and dry weight compared to the cultivated varieties. (Fig. 1F, G).

368 We, then, quantified seed traits of the selected cultivated and wild rice. The cultivated  
369 rice varieties produced higher numbers of spikelets per panicle as well as higher seed weight,  
370 resulting in higher grain yield per plant compared to the wild relatives (Fig. 1H-J). Principal  
371 component analysis for all the quantified biomass and grain-yield traits showed a clear  
372 separation of wild and cultivated genotypes (Supplementary Fig. S2). Taken together, these

373 results confirmed the higher biomass accumulation at the expense of grain yield in the  
374 selected wild rice compared to the cultivated varieties. Wild rice *O. australiensis* had higher  
375 phenotypic values for all the traits contributing to biomass, including tiller number, compared  
376 to Nipponbare. Therefore, we investigated the source strength, sink features, sucrose  
377 translocation as well as the fate of the photosynthates towards biomass and yield using  
378 representative wild rice and cultivated variety, *O. sativa* cv. Nipponbare and *O. australiensis*,  
379 respectively.

380

### 381 **Comparison of source efficiency and photosynthates utilization**

382 In order to compare source efficiency, we quantified leaf photosynthesis rate and  
383 related physiological traits as well as soluble sugars/non-structural carbohydrates (NSCs)  
384 content in the leaves of the two selected accessions. A significant difference in the leaf  
385 photosynthesis rate  $A$  was observed between the two species at booting, and milk- and dough-  
386 stage of grain filling. Both the species showed an increasing trend of leaf photosynthesis from  
387 booting to the milk stage, followed by reduction at the dough stage of grain filling (Fig. 2A).  
388 The higher photosynthesis in *O. australiensis* at the three stages was also associated with  
389 higher  $g_s$  and  $C_i$  compared to Nipponbare (Supplementary Fig. S3A, B). Next, we measured  
390 the different soluble sugars/NSCs, such as sucrose, fructose, glucose, and starch, at the time  
391 of photosynthesis quantification in leaves at the milk stage of grain filling to evaluate the  
392 levels of primary carbon metabolites, the major outcome of photosynthesis. The abundance of  
393 all four NSCs was significantly higher in the leaves of *O. australiensis* than Nipponbare (Fig.  
394 2B, C). Interestingly, *O. australiensis* also accumulated higher levels of starch in leaves  
395 compared to Nipponbare, suggesting an abundance of residual sugar in the wild rice that is  
396 converted to starch. In contrast, the glucose, fructose, and sucrose content as well as starch  
397 content were found to be significantly lower in *O. australiensis* grains compared to  
398 Nipponbare, despite starch being the major reserve product of seeds (Supplementary Fig. S4).  
399 Similarly, seed glucose, fructose, sucrose, and starch content were also found to be  
400 significantly lower in two other wild species *O. latifolia* and *O. rufipogon* compared to the  
401 cultivated varieties IR 64 and Nipponbare. Higher starch and soluble sugar content in *O.*  
402 *australiensis* leaf and lower starch and soluble sugar levels in seed suggested possible  
403 bottlenecks in the mobilization of photosynthates to grains in the wild rice.

404 We, then, quantified end of the day (EOD) and end of the night (EON) carbon status  
405 in the leaves of Nipponbare and *O. australiensis*. Glucose and fructose level were  
406 significantly lower in *O. australiensis* than *O. sativa* cv. Nipponbare at the EOD and EON

407 (Fig. 2D). Sucrose content was marginally, but significantly, higher in *O. australiensis*  
408 compared to *O. sativa* cv. Nipponbare at the EOD as well as EON. At the EOD, *O.*  
409 *australiensis* accumulated more starch in leaves than *O. sativa* cv. Nipponbare (Fig. 2E).  
410 However, *O. australiensis* displayed a significantly lower leaf starch level than *O. sativa* cv.  
411 Nipponbare at the EON, suggesting efficient utilization of stored starch in *O. australiensis*  
412 during the night (Fig. 2E). This is in contrast to lower starch content in the grains of *O.*  
413 *australiensis* as explained earlier (Supplementary Fig. S4). These results indicated the proper  
414 utilization of the photosynthates in *O. australiensis*, however not towards grain filling,  
415 suggesting the possibility of the alternative sink and alternative fate of photosynthates.

416

### 417 **Phloem loading and export of sucrose from leaves**

418 Since sucrose is the major transportable form of photosynthates from source leaves to  
419 sink organs, we investigated the sucrose transport differences between the two accessions.  
420 We performed [<sup>14</sup>C] labelled sucrose assay in leaf discs of *O. sativa* cv. Nipponbare and *O.*  
421 *australiensis*. A higher amount of <sup>14</sup>C per unit leaf disc area was detected in *O. australiensis*  
422 (5598.83 CPM per cm<sup>2</sup>) compared to that of in Nipponbare (3446.66 CPM per cm<sup>2</sup>) (Fig. 2F).  
423 We, then, quantified sucrose in the phloem sap of the two accessions. Phloem sap of *O.*  
424 *australiensis* had four times higher sucrose content than *O. sativa* cv. Nipponbare (Fig. 2G).  
425 Together, <sup>14</sup>C-assay and analysis of phloem sap showed better phloem loading and sucrose  
426 export from the leaf in the wild rice *O. australiensis* compared to Nipponbare.

427

### 428 **Expression pattern of genes encoding sucrose transporters**

429 We examined the contribution of sucrose transporters for differences in phloem  
430 loading and sucrose export from leaves. Since clade III SWEET transporters and SUT  
431 transporters are the major sucrose transporters in plants, we preferentially quantified the  
432 transcript levels of genes encoding those transporters. Expression analysis of *OsSWEETs*  
433 using publicly available datasets showed preferentially source-specific expression of  
434 *OsSWEET13* (Supplementary Fig. S5A). *OsSWEET14* also followed a similar source-specific  
435 expression pattern, but at a relatively lower expression level than *OsSWEET13*. *OsSWEET15*  
436 and *OsSWEET11* showed preferentially sink (panicle and endosperm) specific expression  
437 patterns. The expression levels of *OsSWEET12* was observed to be very low in all the tissues.  
438 Consistent with this, quantitative Real Time-PCR results showed higher transcript levels of  
439 *OsSWEET13* in flag leaf and stem; *OsSWEET11* in the spikelet; and *OsSWEET15* in the stem,  
440 spikelet, and flag leaf of Nipponbare (Fig. 3A-D). Interestingly, the transcript level of

441 *OsSWEET13*, encoding preferentially source-specific SWEET transporter, was significantly  
442 higher in flag leaf and stem of *O. australiensis* compared to Nipponbare (Fig. 3A, B). *In*  
443 *silico* expression analysis showed higher expression of *OsSUT1* and *OsSUT2* in different  
444 tissue compared to other *OsSUTs* (Supplementary Fig. S5B). qRT-PCR analysis confirmed  
445 the generally higher expression of *OsSUT1* and *OsSUT2* in different tissues of Nipponbare  
446 (Fig. 3E-H). We detected higher transcript levels of *OsSUT1* in the flag leaf, and *OsSUT2* in  
447 the stem of *O. australiensis* compared to Nipponbare (Fig. 3E, F). The expression pattern of  
448 *OsSWEETs* and *OsSUTs* suggested the potential involvement of selected transporters, such as  
449 *OsSWEET13*, *OsSUT1*, and *OsSUT2*, for higher phloem loading and sucrose export from  
450 leaf to stem in the wild rice.

451 Despite higher leaf photosynthesis rate and more sucrose export from source leaves,  
452 *O. australiensis* produced smaller and lighter grains with less starch content compared to the  
453 cultivated variety Nipponbare. Therefore, we also examined the transcript levels of different  
454 sucrose transporters in developing spikelets. The expression levels of all the *OsSWEETs* were  
455 significantly lower in spikelets of *O. australiensis* compared to Nipponbare, with almost no  
456 expression of preferentially sink-specific *OsSWEET15* and *OsSWEET11* (Fig. 3D). In  
457 addition, the transcript levels of *OsSUT1* was significantly lower in developing spikelet of *O.*  
458 *australiensis* than Nipponbare (Fig. 3H). Thus, reduced grain filling in *O. australiensis* could  
459 potentially be associated with reduced expression of *OsSWEET15*, *OsSWEET11*, and  
460 *OsSUT1*.

461

#### 462 **Differences in vascular features associated with sucrose transport**

463 Vascular features are also key to photoassimilate partitioning from source to sink  
464 tissues. Therefore, we quantified the vein number and vein width in the fully matured flag  
465 leaves of *O. sativa* cv. Nipponbare and *O. australiensis*. *O. australiensis* leaves had a higher  
466 number of wider veins compared to Nipponbare (Fig. 4A, B). Moreover, *O. australiensis* also  
467 exhibited higher vein density with lesser interveinal distance compared to Nipponbare  
468 (Supplementary Fig. S6A, B). We, then, checked the organization of vascular bundles at the  
469 panicle base of the two accessions, as the panicle base is the site of attachment of spikelets to  
470 the main plant (Zhang *et al.*, 2002; Zhai *et al.*, 2018). *O. australiensis* had a fewer number of  
471 vascular bundles with a reduced area than Nipponbare at the panicle base (Fig. 4C, D). We  
472 also quantified the vascular features in the stem of the two accessions (Fig. 4E, F).  
473 Interestingly, we observed ~1.7 times larger vascular bundles in the *O. australiensis* stem

474 compared to Nipponbare. Further, *O. australiensis* stem also had approximately twice the  
475 number of vascular bundles than Nipponbare stem due to wider stem (Fig. 4F). We also  
476 checked the vascular features in additional cultivated and wild rice accessions, *O. sativa* cv.  
477 IR 64 and *O. latifolia*, respectively. The results were found to be consistent with the  
478 differences between Nipponbare and *O. australiensis* for flag leaves, stem, as well as panicle  
479 base (Supplementary Fig. S7). Taken together, the sucrose mobilization to a panicle in *O.*  
480 *australiensis* might likely be hindered due to defects in the vascular bundle at the panicle  
481 base and minimal expression of *OsSWEETs* in developing spikelets, strengthening the  
482 hypothesis of alternative utilization of photosynthates in the *O. australiensis* stem towards  
483 higher biomass.

484

### 485 **Starch accumulation and expression levels of starch-biosynthesis genes in stem**

486 The higher leaf photosynthesis rate and phloem loading in leaves, along with vascular  
487 features and the expression pattern of sucrose transporter genes indicated stem to be a major  
488 sink organ utilizing sucrose received from leaves in *O. australiensis*. Therefore, we  
489 quantified the content of NSCs in stems of the two species at the milk-stage of grain filling  
490 (Fig. 5A, B). Significantly lower amounts of glucose, fructose, and sucrose were detected in  
491 the stem of *O. australiensis* as compared to Nipponbare (Fig. 5A). This was in contrast to a  
492 higher amount of sucrose being exported from leaves of *O. australiensis*. Therefore, we  
493 suspected that *O. australiensis* might reserve a high amount of starch in their stem. To our  
494 surprise, a negligible amount of starch was present in the stem of *O. australiensis* compared  
495 to Nipponbare (Fig. 5B). Starch content was, further, found to be very low in the *O.*  
496 *australiensis* stems at different stages and in different internodes (Fig. 5C, D). Starch content  
497 in the stems of another cultivated variety, *O. sativa* cv. IR 64, and wild species, *O. latifolia*  
498 and *O. rufipogon*, also showed a similar pattern. Similar to *O. australiensis*, a negligible  
499 amount of starch was present in the stems of *O. latifolia* and *O. rufipogon* compared to IR 64  
500 (Supplementary Fig. 8). We, then, checked the expression of genes involved in starch  
501 biosynthesis. Since we were hypothesizing differential fate of sucrose in the stem, we initially  
502 checked the expression of members of ADP-glucose pyrophosphorylase large subunit  
503 (*OsAPL*) and small subunit (*OsAPS*), and starch synthase (*OsSS*) gene families in internode,  
504 node, and culm of Nipponbare using publicly available data at Genevestigator (Hruz *et al.*,  
505 2008; <https://genevestigator.com/>). We observed generally high expression of these genes in  
506 the internode, node, and stem of the cultivated variety (Supplementary Fig. 9A, B). Since  
507 *OsAPL3*, *OsAPS1*, and *OsSSIIb* from the starch biosynthesis gene families showed the

508 highest expression levels in the internode, we selected these genes for expression analysis at  
509 multiple tissues using Genevestigator as well as qRT-PCR validation in the stem. Expectedly,  
510 very high expressions of these genes were detected in the internode and stem of the cultivated  
511 variety Nipponbare by both *in silico* expression analysis as well as qRT-PCR analysis (Fig.  
512 5E; Supplementary Fig. S11A). Consistent with very low starch levels in *O. australiensis*  
513 stem and internode, the transcript abundance of genes encoding two key enzymes, *OsAPL3*  
514 and *OsAPSI*, was drastically less in *O. australiensis* compared to Nipponbare (Fig. 5E). A  
515 lower amount of soluble non-structural carbohydrates, in particular remarkably low starch  
516 content, despite more sucrose transport from leaves to stem, confirmed an alternative fate to  
517 photosynthates in *O. australiensis* stem.

518

### 519 **Expression levels of sucrose metabolism genes, sucrose synthase and cell wall invertase** 520 **enzyme activity, and structural carbohydrate levels in stem**

521 Invertases (INV) and sucrose synthase (SUS) are the key enzymes for the degradation  
522 of sucrose. Expression of genes encoding invertases has been shown to be strongly correlated  
523 with starch synthesis (Bahaji *et al.*, 2014; Ruan, 2014). An *in silico* expression analysis of  
524 members of Invertase gene-family, including cell wall invertase (*OsCIN*), cytoplasmic  
525 invertase (*OsNIN*), and vacuolar invertase (*OsINV*), showed high expression of many of those  
526 genes in the stem, node, and internode tissues of the cultivated rice (Supplementary Fig.  
527 S10A). Previously, *OsCIN1* and *OsINV2* were shown to be highly abundant in rice stem as  
528 compared to other members of the gene-family (Ji *et al.*, 2005). We, then, checked the  
529 expression pattern of representative genes encoding cell wall invertase (*OsCIN1*),  
530 cytoplasmic invertase (*OsNIN8*), and vacuolar invertase (*OsINV2*) in stem tissues by qRT-  
531 PCR (Fig. 6A). The expression of *OsCIN1* was drastically lower in *O. australiensis* stem  
532 compared to Nipponbare. In addition, *O. australiensis* also showed lower cell wall invertase  
533 activity in the stem (Fig. 6B). Together, limited expression of a cell wall invertase gene along  
534 with lower cell wall invertase enzyme activity would limit the breakdown of sucrose in the *O.*  
535 *australiensis* stem.

536 Among all the *OsSUSs*, *OsSUS1* was shown to be highly expressed in internodes  
537 (Hirose *et al.*, 2008). *In silico* expression analysis also showed high expression of *OsSUS1* in  
538 internode, node, and culm (Supplementary Fig. S10B, S11A). Therefore, we checked the  
539 intracellular localization of OsSUS1 and the expression levels of the corresponding gene. The  
540 OsSUS1-YFP signal overlapped with the plasma membrane-localized marker (PM-mCherry),  
541 confirming OsSUS1 localization in the plasma membrane (Supplementary Fig. S12). *OsSUS1*



542 was expressed four times higher in *O. australiensis* stem than Nipponbare, indicating a  
543 possibility of cellulose accumulation in *O. australiensis* stem (Fig. 6C). Since SUS catalyzes  
544 a reversible cleavage of sucrose, it has a synthesis activity promoting sucrose synthesis and a  
545 cleavage activity promoting sucrose degradation. The enzyme activity assay revealed a higher  
546 OsSUS1 synthesis activity in Nipponbare, while higher cleavage activity in *O. australiensis*  
547 (Fig. 6D, E). Lesser accumulation of starch, more transcript levels of *OsSUS1*, and higher  
548 cleavage activity of OsSUS1 in *O. australiensis* stem compared to Nipponbare along with  
549 localization of OsSUS1 to plasma membrane prompted us to check the cellulose content in  
550 the stems of the two accessions. Cellulose synthase genes are usually expressed at the highest  
551 levels in rice internodes compared to other tissues as evident from *in silico* expression  
552 analysis (Supplementary Fig. S10C, S11B). Interestingly, transcript levels of *OsCES4*,  
553 *OsCES7*, and *OsCES9*, key cellulose synthesis genes, were significantly higher in the stems  
554 of *O. australiensis* than in Nipponbare (Fig. 6F). Calcofluor-white staining along with  
555 cellulose quantification confirmed more cellulose deposition in *O. australiensis* stem  
556 compared to Nipponbare (Fig. 6G, H). Like cellulose, hemicellulose content was also  
557 significantly higher in *O. australiensis* stem compared to Nipponbare (Fig. 6H). We also  
558 compared cultivated rice *O. sativa* cv. IR 64 and wild rice *O. latifolia*, and observed more  
559 cellulose deposition in *O. latifolia* stem compared to IR 64 (Supplementary Fig. S13). Taken  
560 together, lower expression and activity of cell wall invertase, higher expression and cleavage  
561 activity of OsSUS1 coupled with higher expression of cellulose synthase genes, at least in  
562 part, led to the utilization of photosynthates in the *O. australiensis* stem towards cellulose  
563 deposition.

564

## 565 **Discussion**

566 We investigated the differences in source-sink dynamics between a cultivated rice  
567 variety *O. sativa* cv. Nipponbare, which is optimized for high grain yield, and a wild relative  
568 of rice *O. australiensis*, which accumulates high biomass with poor grain yield. *O.*  
569 *australiensis* had higher source strength, as evident by consistently higher leaf photosynthesis  
570 rate compared to Nipponbare, at least in part due to vascular features of the leaf (Fig. 2A and  
571 Fig. 4A, B). High leaf photosynthesis, usually, results in high biomass or yield depending  
572 upon preferential sink tissues, provided efficient transport of photoassimilates from leaves  
573 (Burnett *et al.*, 2016; Fabre *et al.*, 2020; Fernie *et al.*, 2020). Limitations in sucrose export  
574 promote accumulation of sugars in leaves, thereby inhibiting leaf photosynthesis. Therefore,  
575 an efficient sucrose export system from leaf would be warranted for the realization of higher

576 source strength of the wild rice to high biomass and/or yield. <sup>14</sup>C sucrose uptake assay, as  
577 well as sucrose content in phloem sap, confirmed a better sucrose export system from wild  
578 rice *O. australiensis* leaves (Fig. 2F, G). Larger vascular bundles and fewer number of  
579 mesophyll cells between two consecutive veins potentially led to the export of more sucrose  
580 from leaves in *O. australiensis*, as reported in different plant systems (Qi *et al.*, 2008; Fujita  
581 *et al.*, 2013; Mathan *et al.*, 2016). In addition, higher expression of genes encoding sucrose  
582 transporters, OsSWEET13 and OsSUT1, would also facilitate the phloem loading in the wild  
583 rice (Fig. 3). High expression of *SbSWEET8-1* of sorghum, a close homolog of *OsSWEET13*,  
584 in leaf and its function in phloem loading supports our idea of the important role of  
585 *OsSWEET13* in phloem loading (Mizuno *et al.*, 2016). Similarly, *OsSUT1* not only functions  
586 for enhancing phloem loading for sucrose transport but also for retrieval of sucrose from the  
587 apoplasm along the transport pathway (Scofield *et al.*, 2007). Taken together, high  
588 photosynthesis per unit leaf area coupled with efficient export of photosynthates from the  
589 leaves of *O. australiensis* suggested that the wild rice had a higher source strength than  
590 Nipponbare. A higher amount of soluble sugars in *O. australiensis* leaves compared to the  
591 cultivated variety, further, supported the higher source strength of the wild rice (Fig. 2 B, C).

592 The better grain filling and higher grain yield of the cultivated rice Nipponbare,  
593 despite the relatively lower source strength compared to *O. australiensis*, could be explained  
594 by the higher number of larger vascular bundles at the panicle base as well as increased  
595 expression of relevant sucrose transporter genes at the panicle base and spikelets of the  
596 cultivated rice (Fig. 3, 4). Panicle architecture, a key determinant of rice grain yield, is  
597 reported to be shaped by the vascular pattern (Sasahara *et al.*, 1999; Terao *et al.*, 2010).  
598 Reduced expression of *OsSWEET13* and *OsSWEET15* in the developing spikelet, and of  
599 *OsSUT1* at the panicle base and developing spikelet, along with a lower number of smaller  
600 vascular bundles at the panicle base limited mobilization of photosynthates to grains in *O.*  
601 *australiensis* compared to the cultivated rice. In agreement with this, *ossweet11 ossweet15*  
602 double mutant has been reported to show a smaller seed size (Yang *et al.*, 2018). Similarly,  
603 RNA antisense lines of *OsSUT1* showed reduced grain filling and grain weight (Scofield *et*  
604 *al.*, 2007). Increased supply of larger vascular bundles to rice rachis has been shown to  
605 promote a higher number of grains per panicle (Zhang *et al.*, 2002; Terao *et al.*, 2010; Zhai *et*  
606 *al.*, 2018). Altogether, higher source strength and limited grain sink strength in *O.*  
607 *australiensis*, attributed to vascular features and sucrose transporter functions, indicated  
608 preferential utilization of photosynthates in stem and internodes, contributing to source-sink  
609 relationship differences between the selected cultivated and wild rice. In conjunction with

610 this, larger vascular bundles would facilitate efficient sucrose transport and unloading in the  
611 wild rice stem. Such vascular features in the stem would, in turn, also provide mechanical  
612 strength to support the high biomass of *O. australiensis* (Aohara *et al.*, 2009). Our expression  
613 results indicated the potential involvement of OsSWEET13 and OsSUT2 in unloading a  
614 larger amount of sucrose in the stem of the wild rice.

615 There is a competition among the sink tissues for utilization of photosynthates  
616 (Patrick *et al.*, 2013; Durand *et al.*, 2018). According to the EcoMeristem model, the final  
617 plant architecture is an outcome of competition for resources among different plant parts that  
618 depends on photoassimilate-partitioning patterns (Luquet *et al.*, 2006). The higher number of  
619 longer internodes and thicker stem with larger leaves, driving high biomass in *O.*  
620 *australiensis* compared to the cultivated variety, suggested higher utilization of  
621 photosynthates for vegetative growth. The higher biomass and larger organ size of the wild  
622 rice would require more photosynthates for general respiration and maintenance. Efficient  
623 sucrose export from leaves, as shown by higher <sup>14</sup>C phloem loading and sucrose content in  
624 the phloem sap, would fulfill the higher requirement of photosynthates in the wild rice.  
625 Sucrose quantification in the phloem exudates showed a remarkably higher amount of  
626 sucrose in the phloem sap of *O. australiensis* compared to the cultivated variety, whereas the  
627 <sup>14</sup>C sucrose uptake assay showed ~1.6-times higher phloem loading in the wild rice. The  
628 artifact-prone nature of the exudation experiments and/or larger leaf area of the wild rice  
629 might explain the discrepancy between the sucrose uptake assay and the phloem exudate  
630 analysis (Xu *et al.*, 2018). Nonetheless, a higher amount of sucrose loaded into the phloem  
631 and exported from the leaves to stem would support the larger vegetative organ size and  
632 number, and the general maintenance of the higher biomass in the wild rice.

633 The preferential utilization of photosynthates in the stem/internodes of wild rice *O.*  
634 *australiensis* in contrast to grains in the cultivated rice Nipponbare suggested differences in  
635 the photosynthates metabolism in the stem of the two species. Cultivated rice variety clearly  
636 accumulated higher starch content in the stem, which is mobilized to panicle during grain  
637 filling (Fig. 5B). *OsSWEET11* and *OsSWEET15* have been suggested to be important for the  
638 remobilization of carbon reserve from stem to grain, and *OsSUT1* in the retrieval of sucrose  
639 from apoplasmic space to stem for conversion to transitory starch (Wang *et al.*, 2020).  
640 Indeed, the Nipponbare stem showed higher expression of *OsSWEET11*, *OsSWEET15*, and  
641 *OsSUT1* compared to the wild rice along with desirable vascular features at the panicle base.  
642 High expression of starch biosynthesis genes, further, contributed to the roles of the stem as  
643 an effective source in the cultivated variety at the grain filling stage (Fig. 7). The differences

644 in the stem starch content between the two genotypes projected the stored transitory starch in  
645 the stem as a key for source-sink dynamics favoring high grain yield.

646 Cell wall invertases mediate the breakdown of sucrose into glucose and fructose,  
647 which enter the cytoplasm through H<sup>+</sup>/hexose symporters (HXTs) (Ruan *et al.*, 2010). Lower  
648 expression and activity of cell wall invertase in the *O. australiensis* stem, which receives a  
649 higher amount of sucrose from the leaves, would limit the formation of glucose and fructose.  
650 In contrast, higher expression and activity of cell wall invertase in Nipponbare would  
651 generate relatively more hexoses that may facilitate the hexose transport pathway to promote  
652 starch biosynthesis. The cleavage activity of SUS enzyme would produce UDP-glucose from  
653 sucrose in the *O. australiensis* stem, which eventually would promote biomass accumulation  
654 through cellulose deposition (Stein and Granot, 2019). Consistent with this, *O. australiensis*  
655 stem showed a higher expression of *OsSUS1* and higher cleavage activity SUS compared to  
656 Nipponbare. In addition to serving as the prime source for cellulose synthesis, UDP-glucose  
657 can also be converted to starch (Asano *et al.*, 2002; Koch, 2004; Smith *et al.*, 2012)).  
658 However, the possibility was minimized in *O. australiensis* due to the very limited expression  
659 of *OsAPL3* and *OsAPSI*. Thus, most of the SUS-generated UDP-glucose was converted to  
660 cellulose, supported by high expression of cellulose synthase genes, *OsCES4*, *OsCES7*, and  
661 *OsCES9* in *O. australiensis* stem (Fig. 6F). *OsSUS1* has been reported to be located in SE-  
662 CC complexes of phloem, and localization of SUS in phloem is important for cellulose  
663 synthesis (Smith *et al.*, 2012; Regmi *et al.*, 2016). Plasma membrane localization of *OsSUS1*  
664 in this study together with earlier reported association of cellulose synthase complexes to  
665 plasma membrane highlighted the key importance of *OsSUS1* for cellulose synthesis in rice  
666 (Supplementary Fig. S12, Lei *et al.*, 2012). In addition, SUS functions in companion cells of  
667 phloem have been suggested to enhance the sucrose unloading at sink tissues, further helping  
668 in unloading photosynthates in the wild rice stem (Nolte and Koch, 1993; Stein and Granot,  
669 2019, Yao *et al.*, 2020). The potential role of SUS in cellulose synthesis, as well as in  
670 secondary cell wall thickening, has been investigated in the past (Coleman *et al.*, 2009;  
671 Baroja-Fernández *et al.*, 2012; Wei *et al.*, 2015). Consistent with the higher expression of  
672 *OsSUS1* in *O. australiensis*, overexpression of *SUS* has been shown to result in increased  
673 vegetative growth rate, plant height, and biomass in different plant species (Coleman *et al.*,  
674 2006; Nguyen *et al.*, 2016; Stein and Granot, 2019). Contrary to *O. australiensis*, higher  
675 synthesis activity of SUS in the Nipponbare stem might contribute to the sucrose synthesis to  
676 be mobilized for grain filling at the heading stage. The differences between the synthesis and  
677 cleavage activities of SUS between the two species could be due to many potential factors,

678 such as pH and metabolic status of the tissue, cellular localization, phosphorylation, and  
679 oligomerization status of the enzyme (Schmolzer *et al.*, 2016; Stein and Granot, 2019;  
680 Takeda *et al.*, 2017). Our results on differential activity of cell wall invertase and starch  
681 levels in the stem suggested that the metabolic status of the stem could likely be an important  
682 determinant for the differences in synthesis and cleavage activity of SUS between the two  
683 species. Further extensive biochemical investigations would be required to establish the role  
684 of the metabolic status as well as other contributing factors for the observed differences in  
685 SUS synthesis and cleavage activity. Nonetheless, differential functions of cell wall invertase  
686 and sucrose synthase between *O. australiensis* and Nipponbare would, at least in part,  
687 explained the differential fate of photosynthates in the stem (Fig. 7).

688 In summary, differences in vascular features and sucrose transporter functions led to a  
689 differential source-sink relationship between wild rice *O. australiensis* and cultivated variety  
690 *O. sativa* cv. Nipponbare. *O. australiensis* showed source-sink dynamics favoring high  
691 biomass through the accumulation of structural carbohydrates, mediated by lower cell wall  
692 invertase activity, higher SUS cleavage activity together with higher expression of genes  
693 encoding cellulose synthases (Fig. 7). In contrast, source-sink dynamics favored higher grain  
694 yield in Nipponbare via accumulation of transitory starch in the stem, to be mobilized to  
695 panicles with the onset of grain filling. Taken together, vascular features and sucrose  
696 transporter functions along with transitory starch storage mechanism and invertase and SUS  
697 enzyme activity can potentially be targeted for source-sink dynamics favoring either biomass  
698 accumulation in fodder crops or higher grain yield in cereal crops.

699

700

#### 701 **Supplementary data**

702 Fig. S1. Internode length, tiller number, and stem features of the selected cultivated and wild  
703 rice genotypes.

704

705 Fig. S2. Principal component analysis of biomass and yield traits of the selected cultivated  
706 and wild rice species.

707

708 Fig. S3. Stomatal conductance ( $g_s$ ) and intercellular CO<sub>2</sub> concentration ( $C_i$ ) of a cultivated  
709 rice *O. sativa* cv. Nipponbare and a wild rice *O. australiensis* at different stages during  
710 booting and grain-filling.

711

712 Fig. S4. Quantification of soluble sugars in matured seeds of the selected cultivated and wild  
713 rice genotypes.

714

715 Fig. S5. *In silico* organ-specific expression analysis of rice genes encoding clade III *SWEET*  
716 and *SUT* transporters using publicly available data at Genevestigator  
717 (<https://genevestigator.com/>).

718

719 Fig. S6. Quantification of leaf interveinal distance and vein density for a cultivated rice *O.*  
720 *sativa* cv. Nipponbare and a wild rice *O. australiensis*.

721

722 Fig. S7. Vascular features in flag leaf, panicle base, and stem of a cultivated rice *O. sativa* cv.  
723 IR 64 and a wild rice *O. latifolia*.

724

725 Fig. S8. Total starch content in the stem of a cultivated rice *O. sativa* cv. IR 64 and two wild  
726 rice species, *O. rufipogon* and *O. latifolia*.

727

728 Fig. S9. *In silico* expression analysis of rice starch biosynthesis genes using publicly  
729 available data at Genevestigator (<https://genevestigator.com/>) in culm (stem), node, and  
730 internode.

731

732 Fig. S10. *In silico* expression analysis of genes encoding rice invertases (A), sucrose  
733 synthases (B), and cellulose synthases (C) in culm (stem), node, and internode using publicly  
734 available data at Genevestigator (<https://genevestigator.com/>).

735

736 Fig. S11. *In silico* expression pattern of the selected key genes involved in sugar metabolism  
737 in rice using Genevestigator database (<https://genevestigator.com/>) across multiple different  
738 tissues.

739

740 Fig. S12. Localization of OsSUS1-YFP in the plasma membrane of leaf epidermal cells of  
741 *Nicotiana benthamiana*.

742

743 Fig. S13. Calcofluor-white staining for cellulose deposition in the transverse stem sections of  
744 a cultivated rice *O. sativa* cv. IR 64 and a wild rice *O. latifolia*.

745

746 Table S1. List of primer pairs used in the study

747

748 **Acknowledgements**

749 This work was supported by the Innovative Young Biotechnologist Award  
750 (BT/09/IYBA/2015/01) and Ramalingaswamy Re-entry Fellowship  
751 (BT/RLF/reentry/05/2013) to AR from the Department of Biotechnology, Ministry of  
752 Science and Technology, India. JM and AS acknowledge their CSIR-JRF and SERB-NPDF  
753 fellowships, respectively. We also acknowledge Central Instrument Facility, NIPGR;  
754 Advanced Instrumentation Research Facility, JNU; Confocal Microscopy Facility, NIPGR;  
755 and DBT-eLibrary Consortium (DeLCON) for providing access to e-resources.

756

757 **Author Contributions**

758 JM and AR conceptualized the study and designed experiments. JM performed experiments.  
759 JM and AS analysed data. JM, AS and AR wrote the manuscript. All the authors have read  
760 and edited the final manuscript.

761

762 **Data availability statement**

763 Data sharing is not applicable to this article as all created data is already contained within this  
764 article or in the supplementary material.

## References

**Ambavaram MMR, Krishnan A, Trijatmiko KR, Pereira A.** 2011. Coordinated activation of cellulose and repression of lignin biosynthesis pathways in rice. *Plant Physiology* **155**, 916–931.

**Asano T, Kunieda N, Omura Y, et al.** 2002. Rice SPK, a calmodulin-like domain protein kinase, is required for storage product accumulation during seed development: Phosphorylation of sucrose synthase is a possible factor. *Plant Cell* **14**, 619–628.

**Aohara T, Kotake T, Kaneko Y, Takatsuji H, Tsumuraya Y, Kawasaki S.** 2009. Rice brittle culm 5 (brittle node) is involved in secondary cell wall formation in the sclerenchyma tissue of nodes. *Plant & Cell Physiology* **50**, 1886–1897.

**Bahaji A, Li J, Sánchez-López ÁM, et al.** 2014. Starch biosynthesis, its regulation and biotechnological approaches to improve crop yields. *Biotechnology Advances* **32**, 87–106.

**Baroja-Fernández E, Muñoz FJ, Li J, Bahaji A, Almagro G, Montero M, Etxeberria E, Hidalgo M, Sesma MT, Pozueta-Romero J.** 2012. Sucrose synthase activity in the *sus1/sus2/sus3/sus4* Arabidopsis mutant is sufficient to support normal cellulose and starch production. *Proceedings of the National Academy of Sciences of the United States of America* **109**, 321–326.

**Braun DM.** 2012. Sweet! The pathway is complete. *Science* **335**, 173–174.

**Burnett AC, Rogers A, Rees M, Osborne CP.** 2016. Carbon source–sink limitations differ between two species with contrasting growth strategies. *Plant, Cell & Environment* **39**, 2460–2472.

**Chen LQ, Qu XQ, Hou BH, Sosso D, Osorio S, Fernie AR, Frommer WB.** 2012. Sucrose efflux mediated by SWEET proteins as a key step for phloem transport. *Science* **335**, 207–211.

**Cho J II, Kim HB, Kim CY, Hahn TR, Jeon JS.** 2011. Identification and characterization of the duplicate rice sucrose synthase genes *OsSUS5* and *OsSUS7* which are associated with the plasma membrane. *Molecules and Cells* **31**, 553–561.



**Coleman HD, Ellis DD, Gilbert M, Mansfield SD.** 2006. Up-regulation of sucrose synthase and UDP-glucose pyrophosphorylase impacts plant growth and metabolism. *Plant Biotechnology Journal* **4**, 87–101.

**Coleman, H.D., Yan, J. and Mansfield, S.D.** 2009. Sucrose synthase affects carbon partitioning to increase cellulose production and altered cell wall ultrastructure. *Proceedings of the National Academy of Sciences of the United States of America* **106**, 13118–13123.

**Durand M, Mainson D, Porcheron B, Maurousset L, Lemoine R, Pourtau N.** 2018. Carbon source–sink relationship in *Arabidopsis thaliana*: the role of sucrose transporters. *Planta* **247**, 587–611.

**Earley KW, Haag JR, Pontes O, Opper K, Juehne T, Song K, Pikaard CS.** 2006. Gateway-compatible vectors for plant functional genomics and proteomics. *The Plant Journal* **45**, 616–629.

**Fabre D, Dingkuhn M, Yin X, Clément-Vidal A, Roques S, Soutiras A, Luquet D.** 2020. Genotypic variation in source and sink traits affects the response of photosynthesis and growth to elevated atmospheric CO<sub>2</sub>. *Plant, Cell & Environment* **43**, 579–593.

**Fan C, Feng S, Huang J, et al.** 2017. AtCesA8-driven OsSUS3 expression leads to largely enhanced biomass saccharification and lodging resistance by distinctively altering lignocellulose features in rice. *Biotechnology for Biofuels* **10**, 221.

**Fernie AR, Bachem CWB, Helariutta Y, et al.** 2020. Metabolic Aspects of Source – Sink Interactions. *Nature Plants* **6**, 55-66.

**Fujita D, Trijatmiko KR, Tagle AG, et al.** 2013. NAL1 allele from a rice landrace greatly increases yield in modern indica cultivars. *Proceedings of the National Academy of Sciences of the United States of America* **110**, 20431–20436.

**Guevara DR, El-Kereamy A, Yaish MW, Mei-Bi Y, Rothstein SJ.** 2014. Functional characterization of the rice UDP-glucose 4-epimerase 1, OsUGE1: A potential role in cell wall carbohydrate partitioning during limiting nitrogen conditions. *PLoS ONE* **9**, e96158.

**Haigler CH, Ivanova-Datcheva M, Hogan PS, Salnikov V V., Hwang S, Martin K, Delmer DP.** 2001. Carbon partitioning to cellulose synthesis. *Plant Molecular Biology* **47**,

29–51.

**Hirose T, Scofield GN, Terao T.** 2008. An expression analysis profile for the entire sucrose synthase gene family in rice. *Plant Science* **174**, 534–543.

**Hruz T, Laule O, Szabo G, Wessendorp F, Bleuler S, Oertle L, Widmayer P, Gruissem W, Zimmermann P.** 2008. Genevestigator v3: a reference expression database for the meta-analysis of transcriptomes. *Advances in Bioinformatics* 2008, 420747. <https://genevestigator.com/>.

**Ji X, Ende WV, Laere AV, Cheng S, Bennett J.** 2008. Structure, evolution, and expression of the two Invertase gene families of rice. *Journal of Molecular Evolution* **60**, 615–634.

**JMP®.** 1989-2019. Version *14.1*. SAS Institute Inc., Cary, NC. [https://www.jmp.com/en\\_us/home.html](https://www.jmp.com/en_us/home.html).

**Julius BT, Leach KA, Tran TM, Mertz RA, Braun DM.** 2017. Sugar transporters in plants: New insights and discoveries. *Plant & Cell Physiology* **58**, 1442–1460.

**Kim S, Koo I, Wei X, Zhang X.** 2012. A method of finding optimal weight factors for compound identification in gas chromatography-mass spectrometry. *Bioinformatics* **28**, 1158–1163.

**King, R.W. and Zeevaart, J.A.D.** 1974. Enhancement of Phloem Exudation from Cut Petioles by Chelating Agents. *Plant Physiology* **53**, 96–103.

**Koch, K.** 2004. Sucrose metabolism: Regulatory mechanisms and pivotal roles in sugar sensing and plant development. *Current Opinion in Plant Biology* **7**, 235–246.

**Lei, L., Li, S., and Gu, Y.** 2012. Cellulose synthase complexes: composition and regulation. *Frontiers in plant science* **3**, 75.

**Lisec J, Schauer N, Kopka J, Willmitzer L, Fernie AR.** 2006. Gas chromatography mass spectrometry-based metabolite profiling in plants. *Nature Protocols* **1**, 387–396.

**Livak KJ, Schmittgen TD.** 2001. Analysis of relative gene expression data using real-time quantitative PCR and the 2- $\Delta\Delta$ CT method. *Methods* **25**, 402–408.

**Luquet D, Dingkuhn M, Kim H, Tambour L, Clement-Vidal A.** 2006. EcoMeristem, a

model of morphogenesis and competition among sinks in rice. 1. Concept, validation and sensitivity analysis. *Functional Plant Biology* **33**, 309–323.

**Mathan J, Bhattacharya J, Ranjan A.** 2016. Enhancing crop yield by optimizing plant developmental features. *Development* **143**, 3283-3294.

**Mikaia A, White EV, Zaikin V, Zhu D, Sparkman OD, Neta P, Zenkevich I, Linstrom P, Mirokhin Y, Tchekhovskoi D.** 2014. NIST standard reference database 1A. Standard Reference Data, NIST, Gaithersburg, MD, U.S.A. <https://www.nist.gov/srd/nist-standard-reference-database-1a>

**Mitra, P.P. and Loqué, D.** 2014. Histochemical staining of *Arabidopsis thaliana* secondary cell wall elements. *Journal of Visualized Experiments* **13**, e51381.

**Mizuno, H., Kasuga, S. and Kawahigashi, H.** 2016. The sorghum *SWEET* gene family: stem sucrose accumulation as revealed through transcriptome profiling. *Biotechnology for Biofuels* **9**, 127.

**Mund, N.K., Dash, D., Barik, C.R., Goud, V. V., Sahoo, L., Mishra, P. and Nayak, N.R.** 2016. Chemical composition, pretreatments and saccharification of *Senna siamea* (Lam.) H.S. Irwin & Barneby: An efficient biomass producing tree legume. *Bioresource Technology* **207**, 205–212.

**Nelson, B.K., Cai, X. and Nebenführ, A.** 2007. A multicolored set of in vivo organelle markers for co-localization studies in *Arabidopsis* and other plants. *The Plant Journal* **51**, 1126–1136.

**Nguyen QA, Luan S, Wi SG, Bae H, Lee DS, Bae HJ.** 2016. Pronounced phenotypic changes in transgenic tobacco plants overexpressing sucrose synthase may reveal a novel sugar signaling pathway. *Frontiers in Plant Science* **6**, 1216.

**Nishanth MJ, Sheshadri SA, Rathore SS, Srinidhi S, Simon B.** 2018. Expression analysis of *Cell wall invertase* under abiotic stress conditions influencing specialized metabolism in *Catharanthus roseus*. *Scientific Reports* **8**, 15059.

**Nolte KD, Koch KE.** 1993. Companion-cell specific localization of sucrose synthase in zones of phloem loading and unloading. *Plant Physiology* **101**, 899–905.

**Osorio S, Ruan YL, Fernie AR.** 2014. An update on source-to-sink carbon partitioning in tomato. *Frontiers in Plant Science* **5**, 516.

**Patrick JW, Botha FC, Birch RG.** 2013. Metabolic engineering of sugars and simple sugar derivatives in plants. *Plant Biotechnology Journal* **11**, 142–156.

**Qazi, H.A., Paranjpe, S. and Bhargava, S.** 2012. Stem sugar accumulation in sweet sorghum - Activity and expression of sucrose metabolizing enzymes and sucrose transporters. *Journal of Plant Physiology* **169**, 605–613.

**Qi J, Qian Q, Bu Q, et al.** 2008. Mutation of the rice narrow leaf1 gene, which encodes a novel protein, affects vein patterning and polar auxin transport. *Plant Physiology* **147**, 1947–1959.

**Regmi KC, Zhang S, Gaxiola RA.** 2016. Apoplasmic loading in the rice phloem supported by the presence of sucrose synthase and plasma membrane-localized proton pyrophosphatase. *Annals of Botany* **117**, 257–268.

**Ruan Y-L.** 2014. Sucrose Metabolism: Gateway to Diverse Carbon Use and Sugar Signaling. *Annual Review of Plant Biology* **65**, 33–67.

**Sack L, Scoffoni C.** 2013. Leaf venation □: structure , function , development , evolution , ecology and applications in the past, present and future. *New Phytologist* **4**, 983–1000.

**Sanchez, P.L., Wing, R.A. and Brar, D.S.** 2013. The wild relative of rice: genomes and genomics. In *Genetics and genomics of rice* (Zhang, Q. and Wing, R.A., eds). Springer, pp. 10–25.

**Sasahara H, Fukuta Y, Fukuyama T.** 1999. Mapping of QTLs for Vascular Bundle System and Spike Morphology in Rice, *Oryza sativa* L. *Breeding Science* **49**, 75–81.

**Schindelin J, Arganda-Carreras I, Frise E, et al.** 2012. Fiji: an open-source platform for biological-image analysis. *Nature Methods* **9**, 676–682.

**Schmolzer K, Gutmann A, Diricks M, Desmet T, Nidetzky B.** 2016. Sucrose synthase: a unique glycosyltransferase for biocatalytic glycosylation process development. *Biotechnology Advances* **34**, 88–111.

**Scofield GN, Hirose T, Aoki N, Furbank RT.** 2007. Involvement of the sucrose transporter, OsSUT1, in the long-distance pathway for assimilate transport in rice. *Journal of Experimental Botany* **58**, 3155–3169.

**Scofield GN, Hirose T, Gaudron JA, Upadhyaya NM, Ohsugi R, Furbank RT.** 2002. Antisense suppression of the rice sucrose transporter gene, OsSUT1, leads to impaired grain filling and germination but does not affect photosynthesis. *Functional Plant Biology* **29**, 815–826.

**Smith AM, Kruger NJ, Lunn JE.** 2012. Source of sugar nucleotides for starch and cellulose synthesis. *Proceedings of the National Academy of Sciences of the United States of America* **109**, E776–E776.

**Smith AM, Stitt M.** 2007. Coordination of carbon supply and plant growth. *Plant, Cell & Environment* **30**, 1126–1149.

**Smith, M.R., Rao, I.M. and Merchant, A.** 2018. Source-sink relationships in crop plants and their influence on yield development and nutritional quality. *Frontiers in Plant Science* **871**, 1889.

**Stein O, Granot D.** 2019. An overview of sucrose synthases in plants. *Frontiers in Plant Science* **10**, 95.

**Takeda H, Niikura M, Narumi A, Aoki H, Sasaki T, Shimada H.** 2017. Phosphorylation of rice sucrose synthase isoforms promotes the activity of sucrose degradation. *Plant Biotechnology* **34(2)**,107-113.

**Tanaka K, Murata K, Yamazaki M, Onosato K, Miyao A, Hirochika H.** 2003. Three distinct rice cellulose synthase catalytic subunit genes required for cellulose synthesis in the secondary wall. *Plant Physiology* **133**, 73–83.

**Terao T, Nagata K, Morino K, Hirose T.** 2010. A gene controlling the number of primary rachis branches also controls the vascular bundle formation and hence is responsible to increase the harvest index and grain yield in rice. *Theoretical and Applied Genetics* **120**, 875–893.

**Tomlinson KL, McHugh S, Labbe H, Grainger JL, James LE, Pomeroy KM, Mullin JW, Miller SS, Dennis DT, Miki BLA.** 2004. Evidence that the hexose-to-sucrose ratio does not control the switch to storage product accumulation in oilseeds: analysis of tobacco seed development and effects of overexpressing apoplasmic invertase. *Journal of Experimental Botany* **55**, 2291–2303.

**Wang D, Qin Y, Fang J, Yuan S, Peng L, Zhao J, Li X.** 2016. A missense mutation in the zinc finger domain of OsCESA7 deleteriously affects cellulose biosynthesis and plant growth in rice. *PLoS ONE* **11**, e0153993.

**Wang DR, Han R, Wolfrum EJ, McCouch SR.** 2017. The buffering capacity of stems: genetic architecture of nonstructural carbohydrates in cultivated Asian rice, *Oryza sativa*. *New Phytologist* **215**, 658–671.

**Wang G, Li H, Gong Y, Yang J, Yi Y, Zhang J, Ye N.** 2020. Expression profile of the carbon reserve remobilization from the source to sink in rice in response to soil drying during grain filling. *Food and Energy Security* **3**, e204.

**Wei Z, Qu Z, Zhang L, Zhao S, Bi Z, Ji X, Wang X, Wei H.** 2015. Overexpression of poplar xylem sucrose synthase in tobacco leads to a thickened cell wall and increased height. *PLoS ONE* **10**, e0120669.

**White, A.C., Rogers, A., Rees, M. and Osborne, C.P.** 2016. How can we make plants grow faster? A source-sink perspective on growth rate. *Journal of Experimental Botany* **67**, 31–45.

**Xu Q, Chen S, Yunjuan R, Chen S, Liesche J.** 2018. Regulation of sucrose transporters and phloem loading in response to environmental cues. *Plant Physiology*, **176**, 930-945.

**Yadav, U., Khadilkar, A., Shaikh, M., Turgeon, R. and Ayre, B.** (2017) Quantifying the Capacity of Phloem Loading in Leaf Disks with [<sup>14</sup>C]Sucrose. *Bio-Protocol* **7**, e2658.

**Yang J, Luo D, Yang B, Frommer WB, Eom JS.** 2018. SWEET11 and 15 as key players in seed filling in rice. *New Phytologist* **218**, 604–615.

**Yao D, Gonzales-Vigil E, Mansfield SD.** 2020. Arabidopsis sucrose synthase localization indicates a primary role in sucrose translocation in phloem. *Journal of Experimental Botany* **71**, 1858–1869.

**Yin X, Guo W, Spiertz JH.** 2009. A quantitative approach to characterize sink-source relationships during grain filling in contrasting wheat genotypes. *Field Crops Research* **114**, 119-126.

**Zhai L, Zheng T, Wang X, Wang Y, Chen K, Wang S, Wang Y, Xu J, Li Z.** 2018. QTL mapping and candidate gene analysis of peduncle vascular bundle related traits in rice by genome-wide association study. *Rice* **11**, 13.

**Zhang ZH, Li P, Wang LX, Tan CJ, Hu ZL, Zhu YG, Zhu LH** 2002. Identification of quantitative trait loci (QTLs) for the characters of vascular bundles in peduncle related to indica -japonica differentiation in rice (*Oryza sativa L.*) *Euphytica* **128**, 279 –284.

## Figure legends

### **Fig. 1. Comparison of biomass and yield-related traits of the selected cultivated and wild rice genotypes.**

(A) Shown are the photographs of the selected rice genotypes at the reproductive stage (scale bar = 30 cm).

(B–J) Quantification of plant height (B), total leaves per plant (C), average leaf surface area (D), total internode number per main stem (E), fresh weight (F), dry weight (G), spikelet per panicle (H), 1000-grain weight (I), and grain yield per plant (J) of the selected rice genotypes. Each box and whisker plot shows the interquartile range with minimum and maximum values of ten data points from different plants. Significance of differences among the genotypes was calculated using One-Way ANOVA with Tukey's post-hoc test ( $n = 10$ ,  $p \leq 0.05$ ).

### **Fig. 2. Leaf photosynthesis, sugar accumulation, phloem loading, and sucrose export from leaves of a cultivated rice *O. sativa* cv. Nipponbare and a wild rice *O. australiensis*.**

(A) Quantification of flag leaf photosynthesis per unit area (A) at different stages during booting and grain-filling ( $n = 15$ ).

(B–C) Shown are glucose, fructose, and sucrose content (B), and total starch content (C) in the flag leaves of the cultivated and wild rice at the time of photosynthesis quantification ( $n = 4$ ).

(D–E) Quantification of glucose, fructose, and sucrose content (D), and total starch content (E) in the flag leaves of the cultivated and wild rice at the End Of Day (EOD) and End Of Night (EON) ( $n = 4$ ).

(F) Uptake of [ $^{14}\text{C}$ ] sucrose in the flag leaf discs expressed as counts per minute (CPM) per square centimeter of leaf area ( $n = 6$ ).

(G) Sucrose quantification in the phloem sap of the two species ( $n = 4$ ).

Data represent the mean and standard deviation (SD), and significance of differences between the genotypes was calculated using student t-test (\* $p < 0.05$ , \*\* $p < 0.01$ , \*\*\* $p < 0.001$ ).



**Fig. 3. Tissue-specific expression pattern of genes encoding SWEET and SUT transporters in a cultivated rice *O. sativa* cv. Nipponbare and a wild rice *O. australiensis*.**

(A–D) Transcript levels of *SWEET* genes in the flag leaf (A), stem (B), panicle base (C), and spikelet (D) at the milk-stage of grain-filling in the two rice species.

(E–H) Transcript levels of *SUT* genes in the flag leaf (E), stem (F), panicle base (G), and spikelet (H) at the milk-stage of grain-filling in the two rice species.

Data represent the mean ( $n = 3$ ) and standard deviation (SD), and significance of differences between the genotypes was calculated using student t-test (\* $p < 0.05$ , \*\* $p < 0.01$ , \*\*\* $p < 0.001$ ).

**Fig. 4. Vascular features in flag leaf, panicle base, and stem of a cultivated rice *O. sativa* cv. Nipponbare and a wild rice *O. australiensis*.**

(A–B) Cross-sections of flag leaves of the two species (A, scale bar = 100  $\mu\text{m}$ ), and quantification of minor vein width and the total number of veins (B).

(C–D) Transverse sections at the panicle base (0.5 cm above panicle node) of the two species (C, scale bar = 250  $\mu\text{m}$ ), and quantification of number and area of vascular bundles (D).

(E–F) Transverse sections of stems of the two species (E, scale bar = 100  $\mu\text{m}$ ), and quantification of number and area of vascular bundles (F).

The peripheral concentric ring of the panicle base and stem is represented as the outer ring, and the inner wider circle is represented as the inner ring in figures.

Data represent the mean and standard deviation (SD) from fifteen cross-section images collected from five different plants ( $n = 5$ ), and significance of differences between the genotypes was calculated using student t-test (\* $p < 0.05$ , \*\* $p < 0.01$ , \*\*\* $p < 0.001$ ).

**Fig. 5. Quantification of soluble sugars and expression pattern of starch-biosynthesis genes in stems of a cultivated rice *O. sativa* cv. Nipponbare and a wild rice *O. australiensis*.**

(A–B) Glucose, fructose, and sucrose content (A), and total starch content (B) in the stem of the two species at the milk-stage of grain-filling ( $n = 4$ ).

(C) Quantification of total starch in the stem at the vegetative and booting stage of the two species ( $n = 4$ ).

(D) Starch content in the flag leaf sheath and different internodes at milk-stage of grain-filling of the two species ( $n = 4$ ).

(E) Transcript levels of starch-biosynthesis genes, *OsAPL3* (encoding ADP-glucose pyrophosphorylase large subunit), *OsAPSI* (encoding ADP-glucose pyrophosphorylase small subunit), and *OsSSIIB* (encoding Starch synthase) in the stem of the two species at milk-stage of grain-filling (n = 3).

Data represent the mean and standard deviation (SD), and significance of differences between the genotype was calculated using student t-test (\*p < 0.05, \*\*p < 0.01, \*\*\*p < 0.001).

**Fig. 6. Gene expression and activities of sugar metabolic enzymes, and structural carbohydrates levels in stem tissue of a cultivated rice *O. sativa* cv. Nipponbare and a wild rice *O. australiensis* at milk-stage of grain-filling.**

(A) Transcript levels of genes encoding cell wall invertase (*OsCIN1*), cytoplasmic invertase (*OsNIN8*), and vacuolar invertase (*OsINV2*) (n = 3).

(B) Cell wall invertase enzyme activity (n = 4).

(C) Transcript levels of *Sucrose Synthase 1* (*OsSUS1*) (n = 3).

(D-E) OsSUS enzyme activity in synthesis (D) and cleavage (E) direction (n = 4).

(F) Transcript levels of *Cellulose Synthase* genes, *OsCES4*, *OsCES7*, and *OsCES9* (n = 3).

(G) Calcofluor-white staining for cellulose deposition in the transverse stem sections of the two species. Red arrowhead shows higher deposition of cellulose in *O. australiensis* stem. Scale bar represents 500  $\mu$ m.

(H) Quantification of cellulose and hemicellulose in the stems of the two species (n = 4).

Data represent the mean and standard deviation (SD), and significance of differences between the genotypes was calculated using student t-test (\*p < 0.05, \*\*p < 0.01, \*\*\*p < 0.001).

**Fig. 7. A model explaining the contribution of sucrose transport, sucrose metabolic enzyme activity, starch biosynthesis, and synthesis of structural carbohydrates towards yield and biomass differences between a wild rice *O. australiensis* and a cultivated rice *O. sativa* cv. Nipponbare.**

High leaf photosynthesis rate coupled with higher expression of selected *OsSWEET* and *OsSUT* genes mediate export of a higher amount of sucrose from a leaf in *O. australiensis* compared to *O. sativa* cv. Nipponbare. A higher amount of sucrose gets unloaded into the stem of *O. australiensis* due to the functions of *OsSWEET13* and *OsSUT2*. However, a lower expression of a gene encoding cell wall invertase (*OsCIN1*) along with the lower activity of cell wall invertase would limit the formation of glucose and fructose in the wild rice stem. Sucrose gets converted to UDP-G more efficiently in the wild rice *O. australiensis* due to

higher expression of *OsSUS1* and more cleavage activity of OsSUS compared to the cultivated rice Nipponbare. Higher expressions of *OsCES4*, *OsCES7*, and *OsCES9*, then, promote the synthesis of cellulose in the stem of the wild rice. In contrast, higher expressions of starch-biosynthesis genes (*AGPase*, small and large subunit) lead to higher starch content in the stem of the cultivated rice. The higher synthesis activity of OsSUS along with the higher expression of *OsSWEET11* and *OsSWEET15* in the cultivated rice would facilitate efficient remobilisation of sucrose from stem to panicles at the grain-filling stage. SUC, sucrose (yellow colour circle); F, fructose; G, glucose; UDP-G, UDP-glucose; ADP-G, ADP-glucose; *INV*, invertase; cwINV, cell wall invertase; SUS, sucrose synthase.

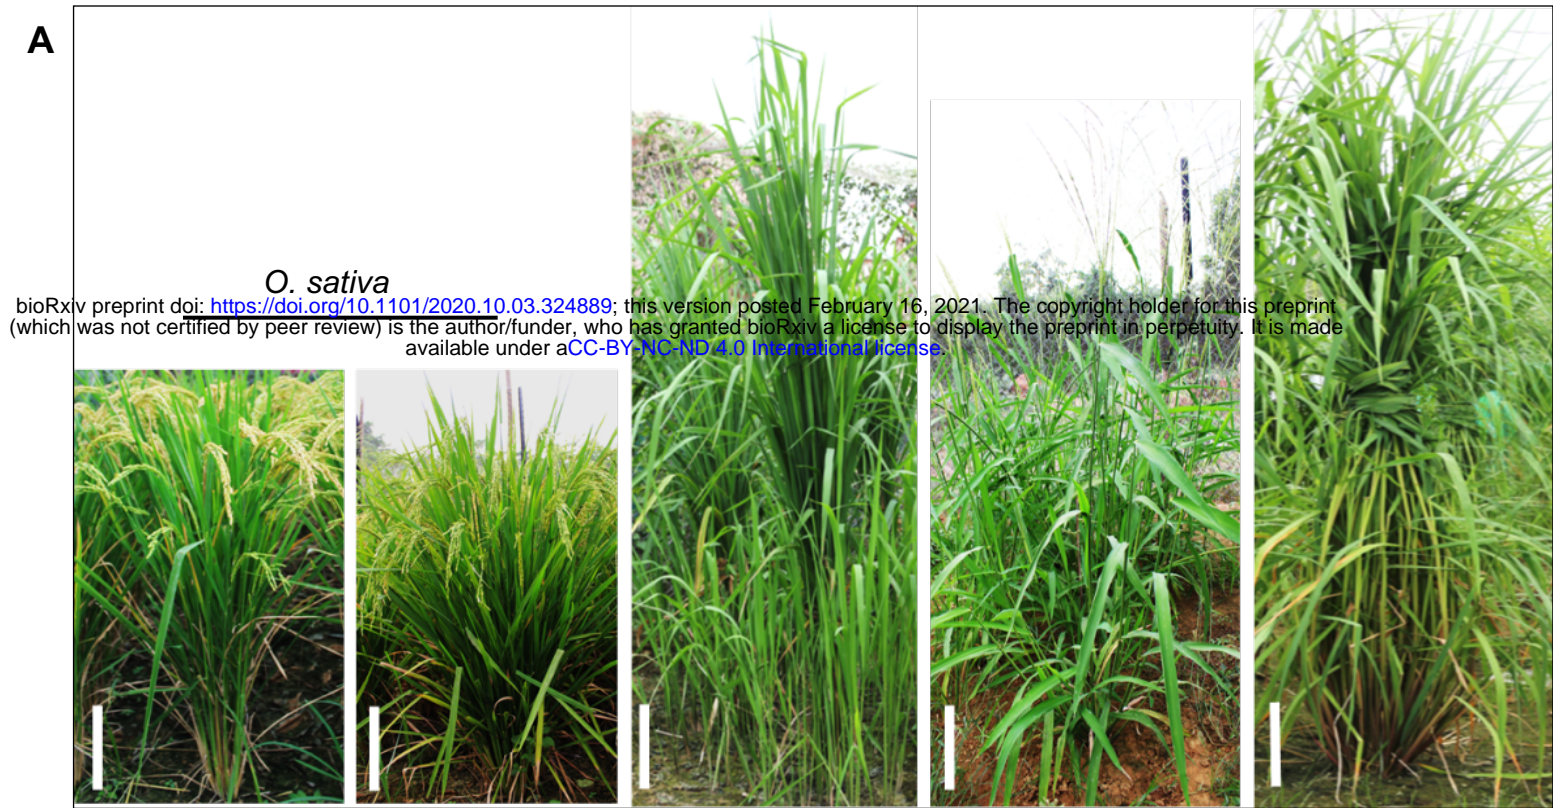

*O. sativa* cv. Nipponbare  
 *O. sativa* cv. IR 64  
 *O. rufipogon*  
 *O. latifolia*  
 *O. australiensis*

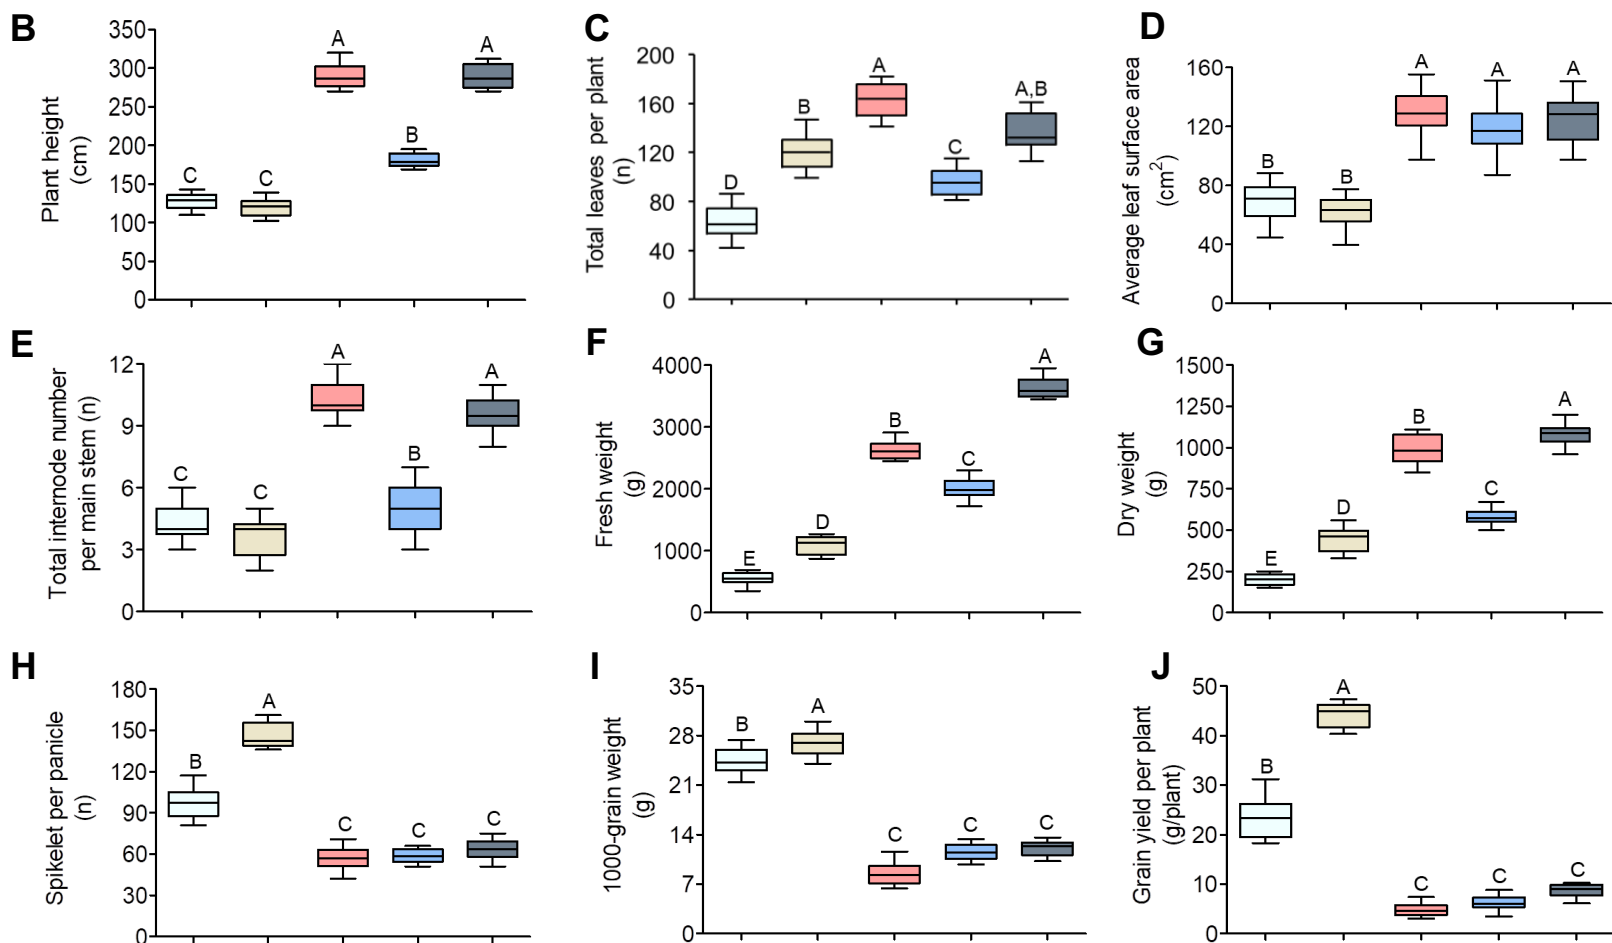

**Fig. 1. Comparison of biomass and yield-related traits of the selected cultivated and wild rice genotypes.**

(A) Shown are the photographs of the selected rice genotypes at the reproductive stage (scale bar = 30 cm).

(B–J) Quantification of plant height (B), total leaves per plant (C), average leaf surface area (D), total internode number per main stem (E), fresh weight (F), dry weight (G), spikelet per panicle (H), 1000-grain weight (I), and grain yield per plant (J) of the selected rice genotypes. Each box and whisker plot shows the interquartile range with minimum and maximum values of ten data points from different plants. Significance of differences among the genotypes was calculated using One-Way ANOVA with Tukey's post-hoc test ( $n = 10$ ,  $p \leq 0.05$ ).

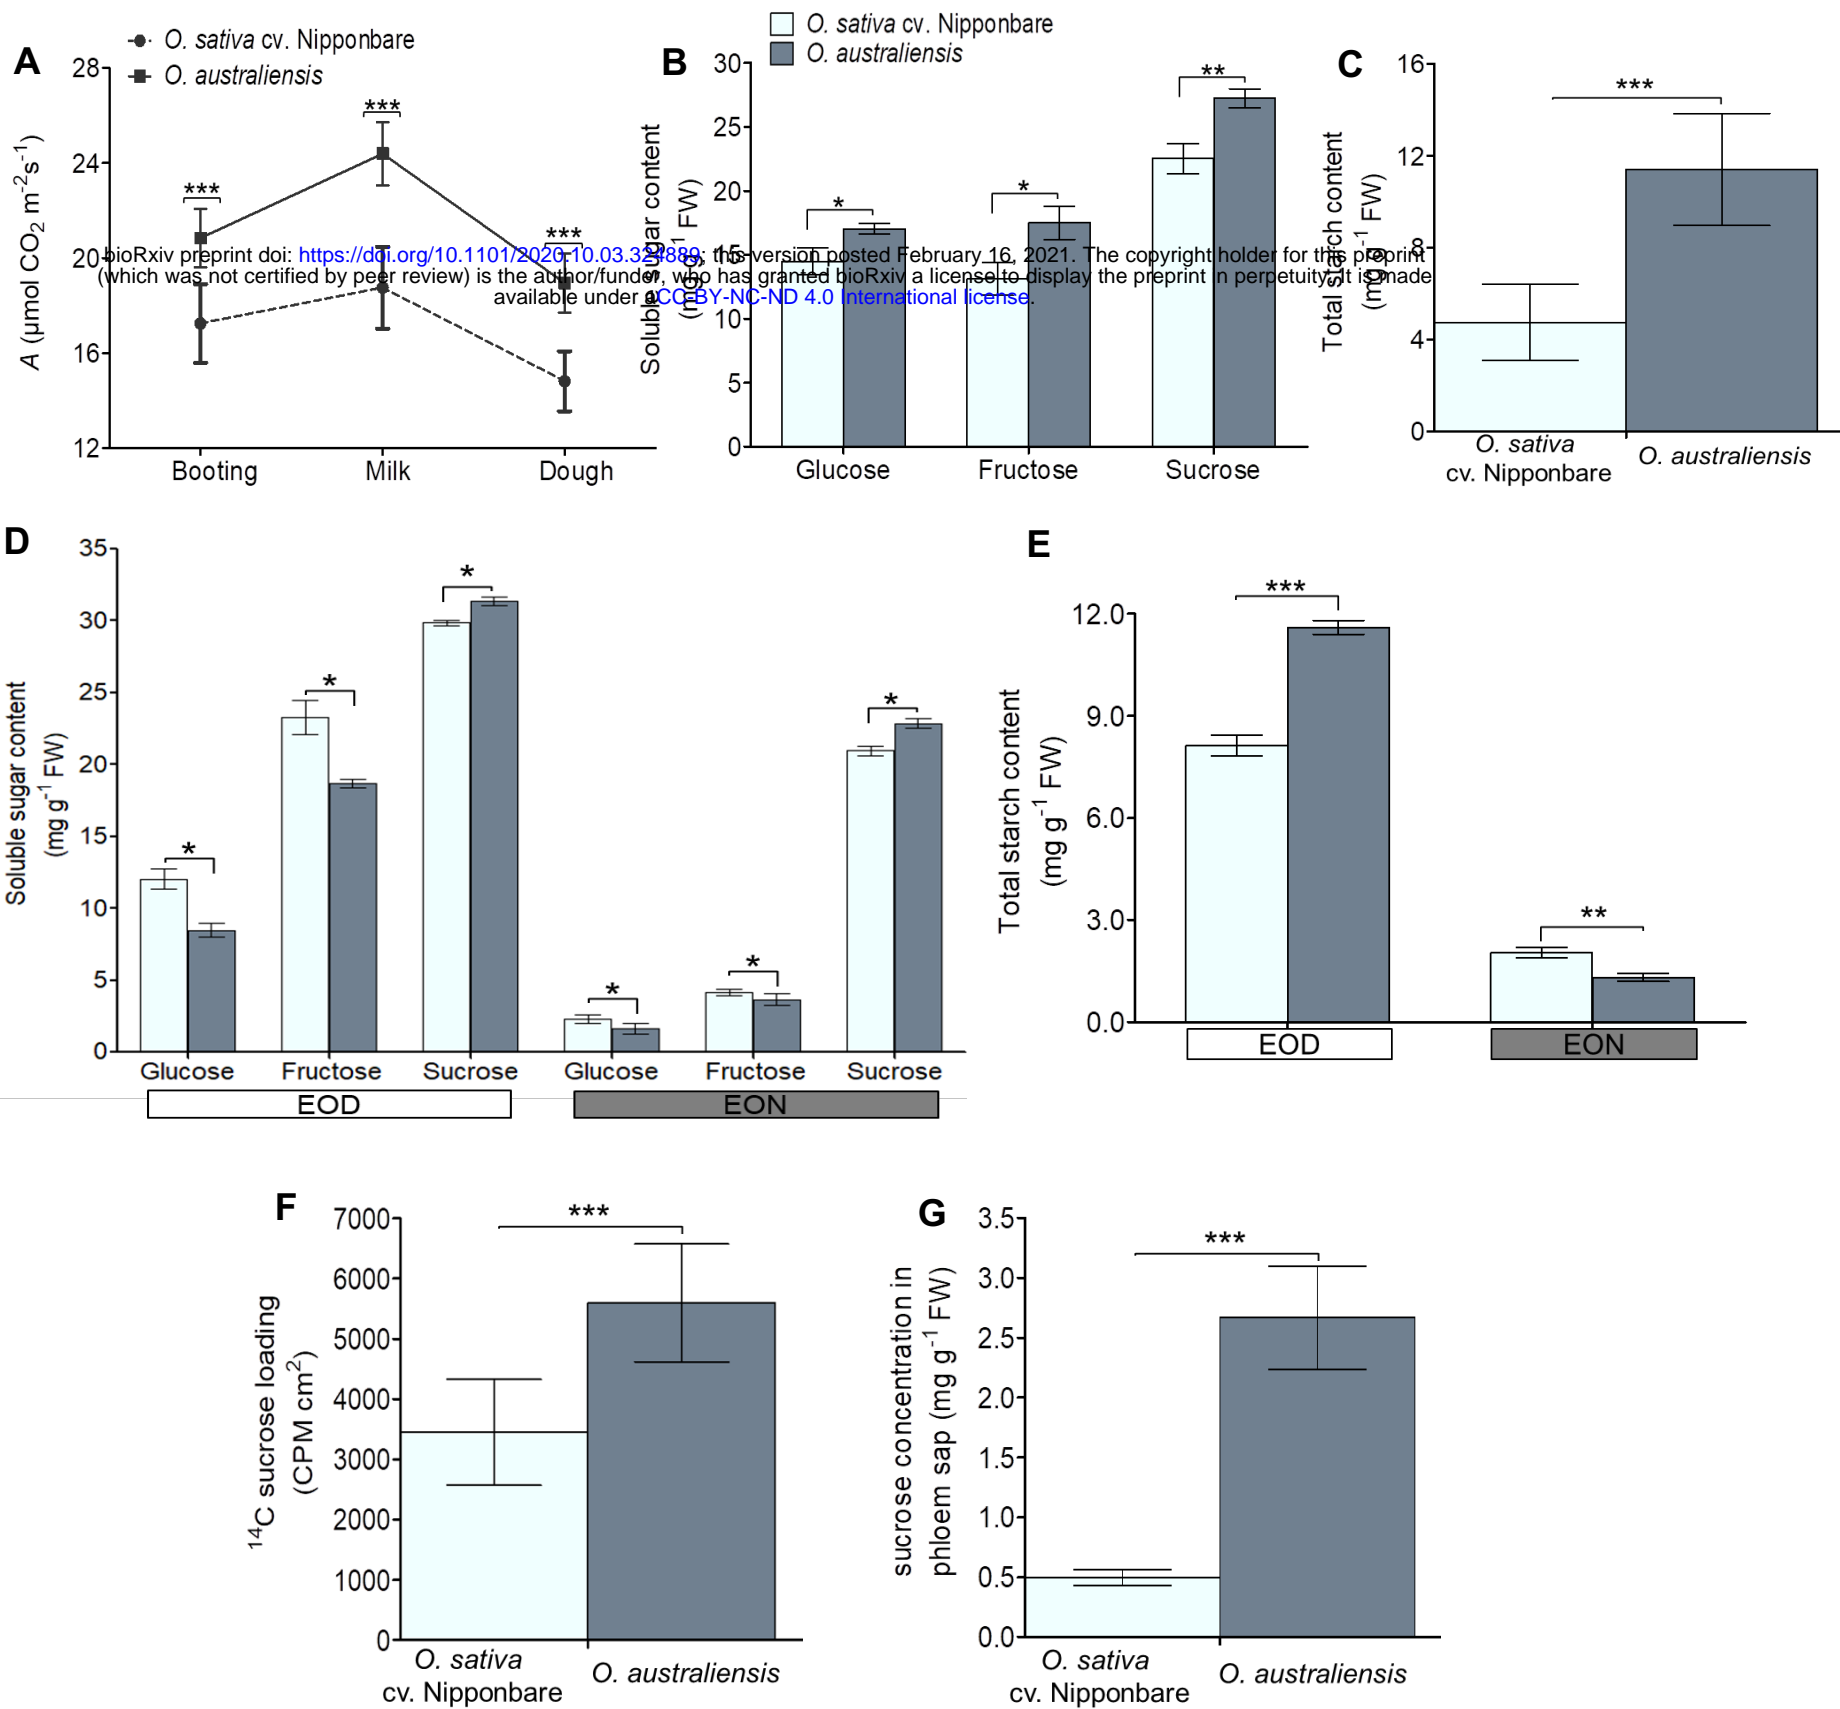

**Fig. 2. Leaf photosynthesis, sugar accumulation, phloem loading, and sucrose export from leaves of a cultivated rice *O. sativa* cv. Nipponbare and a wild rice *O. australiensis*.**

(A) Quantification of flag leaf photosynthesis per unit area ( $A$ ) at different stages during booting and grain-filling ( $n = 15$ ).

(B-C) Shown are glucose, fructose, and sucrose content (B), and total starch content (C) in the flag leaves of the cultivated and wild rice at the time of photosynthesis quantification ( $n = 4$ ).

(D-E) Quantification of glucose, fructose, and sucrose content (D), and total starch content (E) in the flag leaves of the cultivated and wild rice at the end of day (EOD) and end of night (EON) ( $n = 4$ ).

(F) Uptake of [<sup>14</sup>C] sucrose in the flag leaf discs expressed as counts per minute (CPM) per square centimeter of leaf area ( $n = 6$ ).

(G) Sucrose quantification in the phloem sap of the two species ( $n = 4$ ).

Data represent the mean and standard deviation (SD), and significance of differences between the genotypes was calculated using student t-test (\* $P < 0.05$ , \*\* $P < 0.01$ , \*\*\* $P < 0.001$ ).

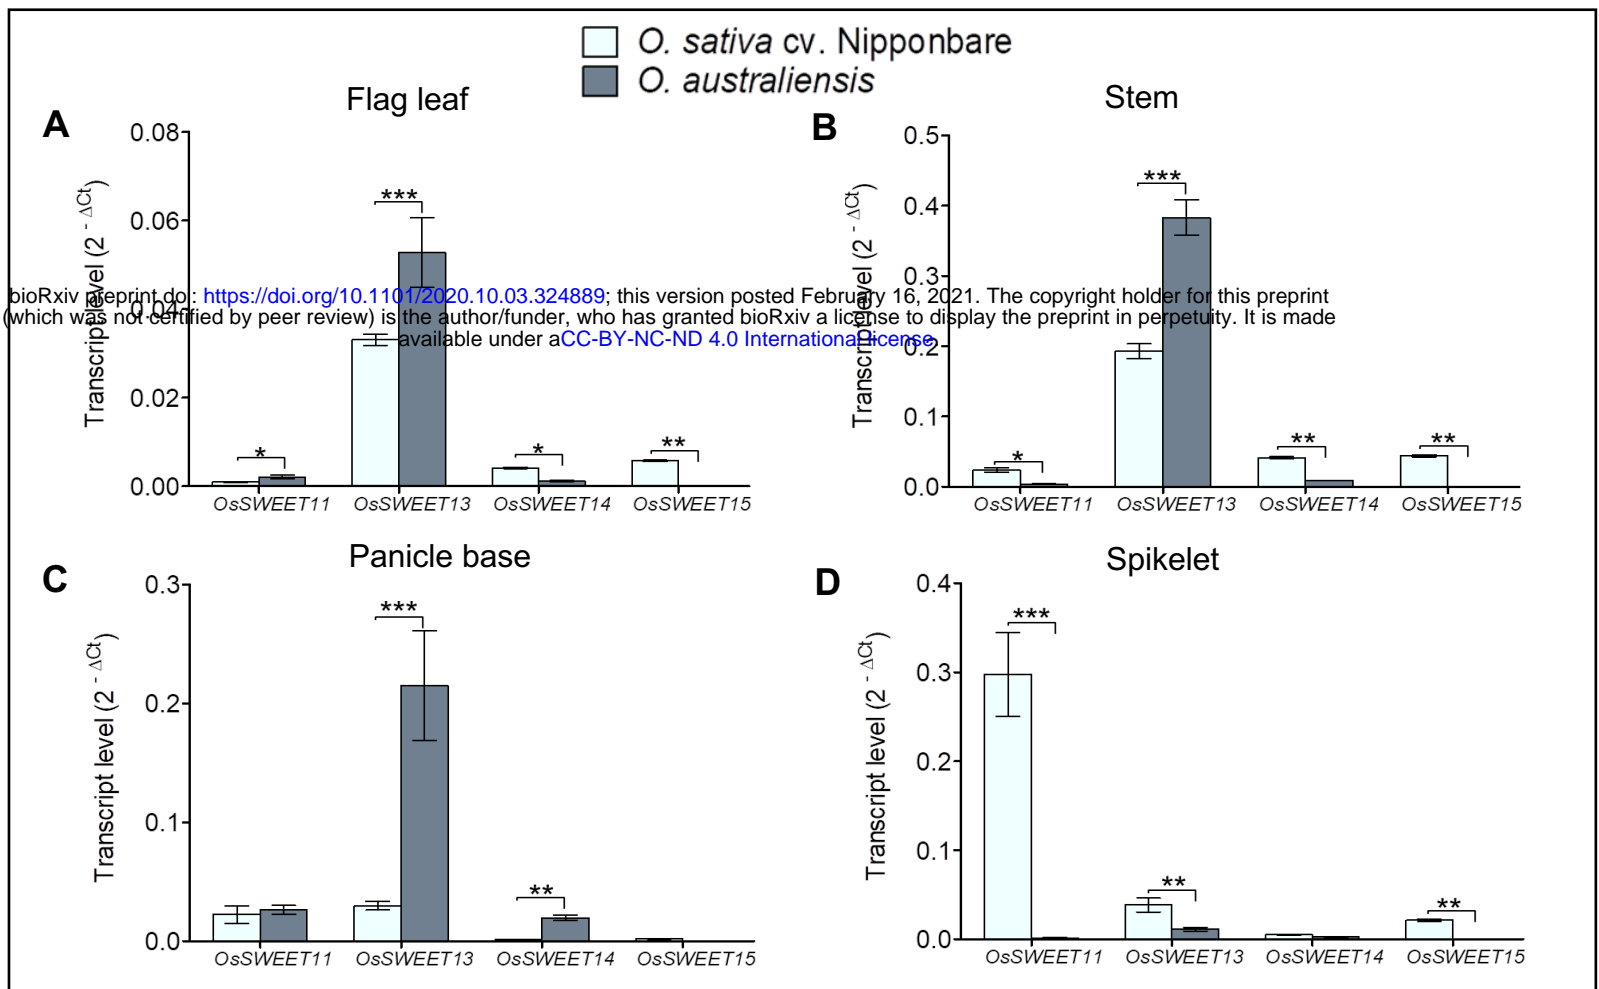

**Fig. 3. Tissue-specific expression pattern of genes encoding SWEET and SUT transporters in a cultivated rice *O. sativa* cv. Nipponbare and a wild rice *O. australiensis*.**

(A–D) Transcript levels of *SWEET* genes in the flag leaf (A), stem (B), panicle base (C), and spikelet (D) at the milk-stage of grain-filling in the two rice species.

(E–H) Transcript levels of *SUT* genes in the flag leaf (E), stem (F), panicle base (G), and spikelet (H) at the milk-stage of grain-filling in the two rice species.

Data represent the mean (n = 3) and standard deviation (SD), and significance of differences between the genotypes was calculated using student t-test (\*p < 0.05, \*\*p < 0.01, \*\*\*p < 0.001).

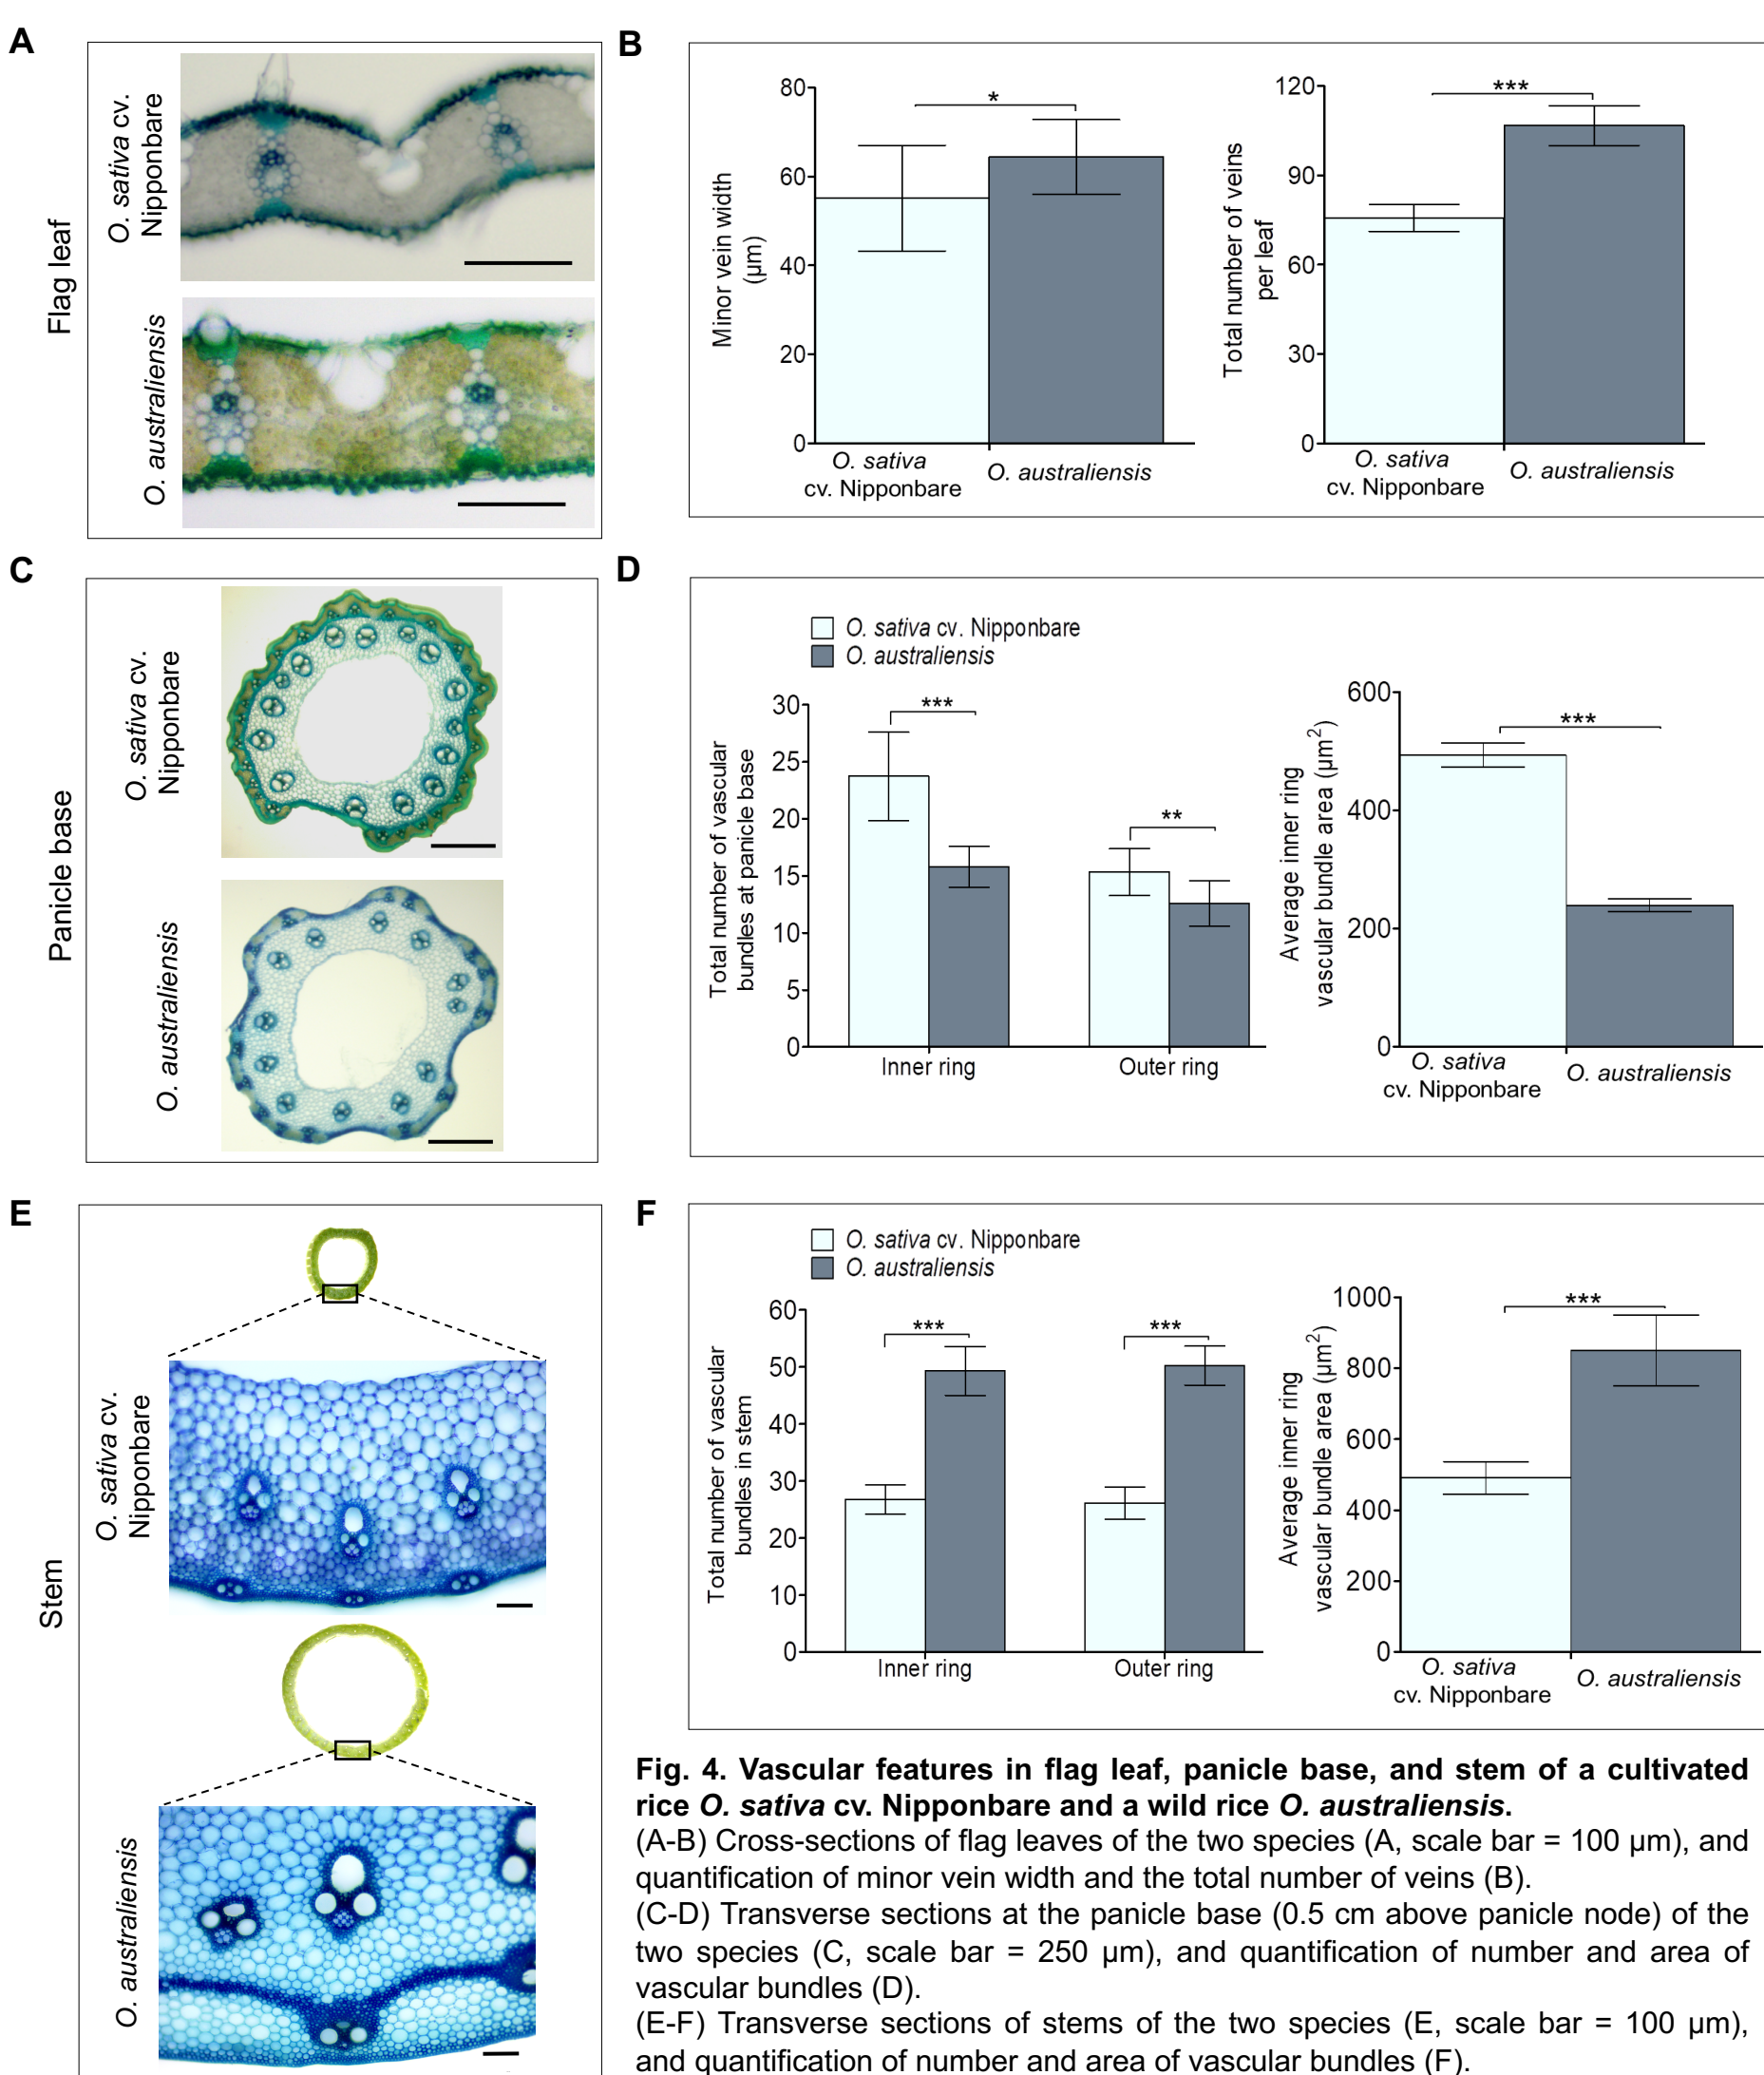

**Fig. 4. Vascular features in flag leaf, panicle base, and stem of a cultivated rice *O. sativa* cv. Nipponbare and a wild rice *O. australiensis*.**

(A-B) Cross-sections of flag leaves of the two species (A, scale bar = 100  $\mu\text{m}$ ), and quantification of minor vein width and the total number of veins (B).

(C-D) Transverse sections at the panicle base (0.5 cm above panicle node) of the two species (C, scale bar = 250  $\mu\text{m}$ ), and quantification of number and area of vascular bundles (D).

(E-F) Transverse sections of stems of the two species (E, scale bar = 100  $\mu\text{m}$ ), and quantification of number and area of vascular bundles (F).

The peripheral concentric ring of the panicle base and stem is represented as the outer ring, and the inner wider circle is represented as the inner ring in figures.

Data represent the mean and standard deviation (SD) from fifteen cross-section images collected from five different plants ( $n = 5$ ), and significance of differences between the genotypes was calculated using student t-test (\* $P < 0.05$ , \*\* $P < 0.01$ , \*\*\* $P < 0.001$ ).

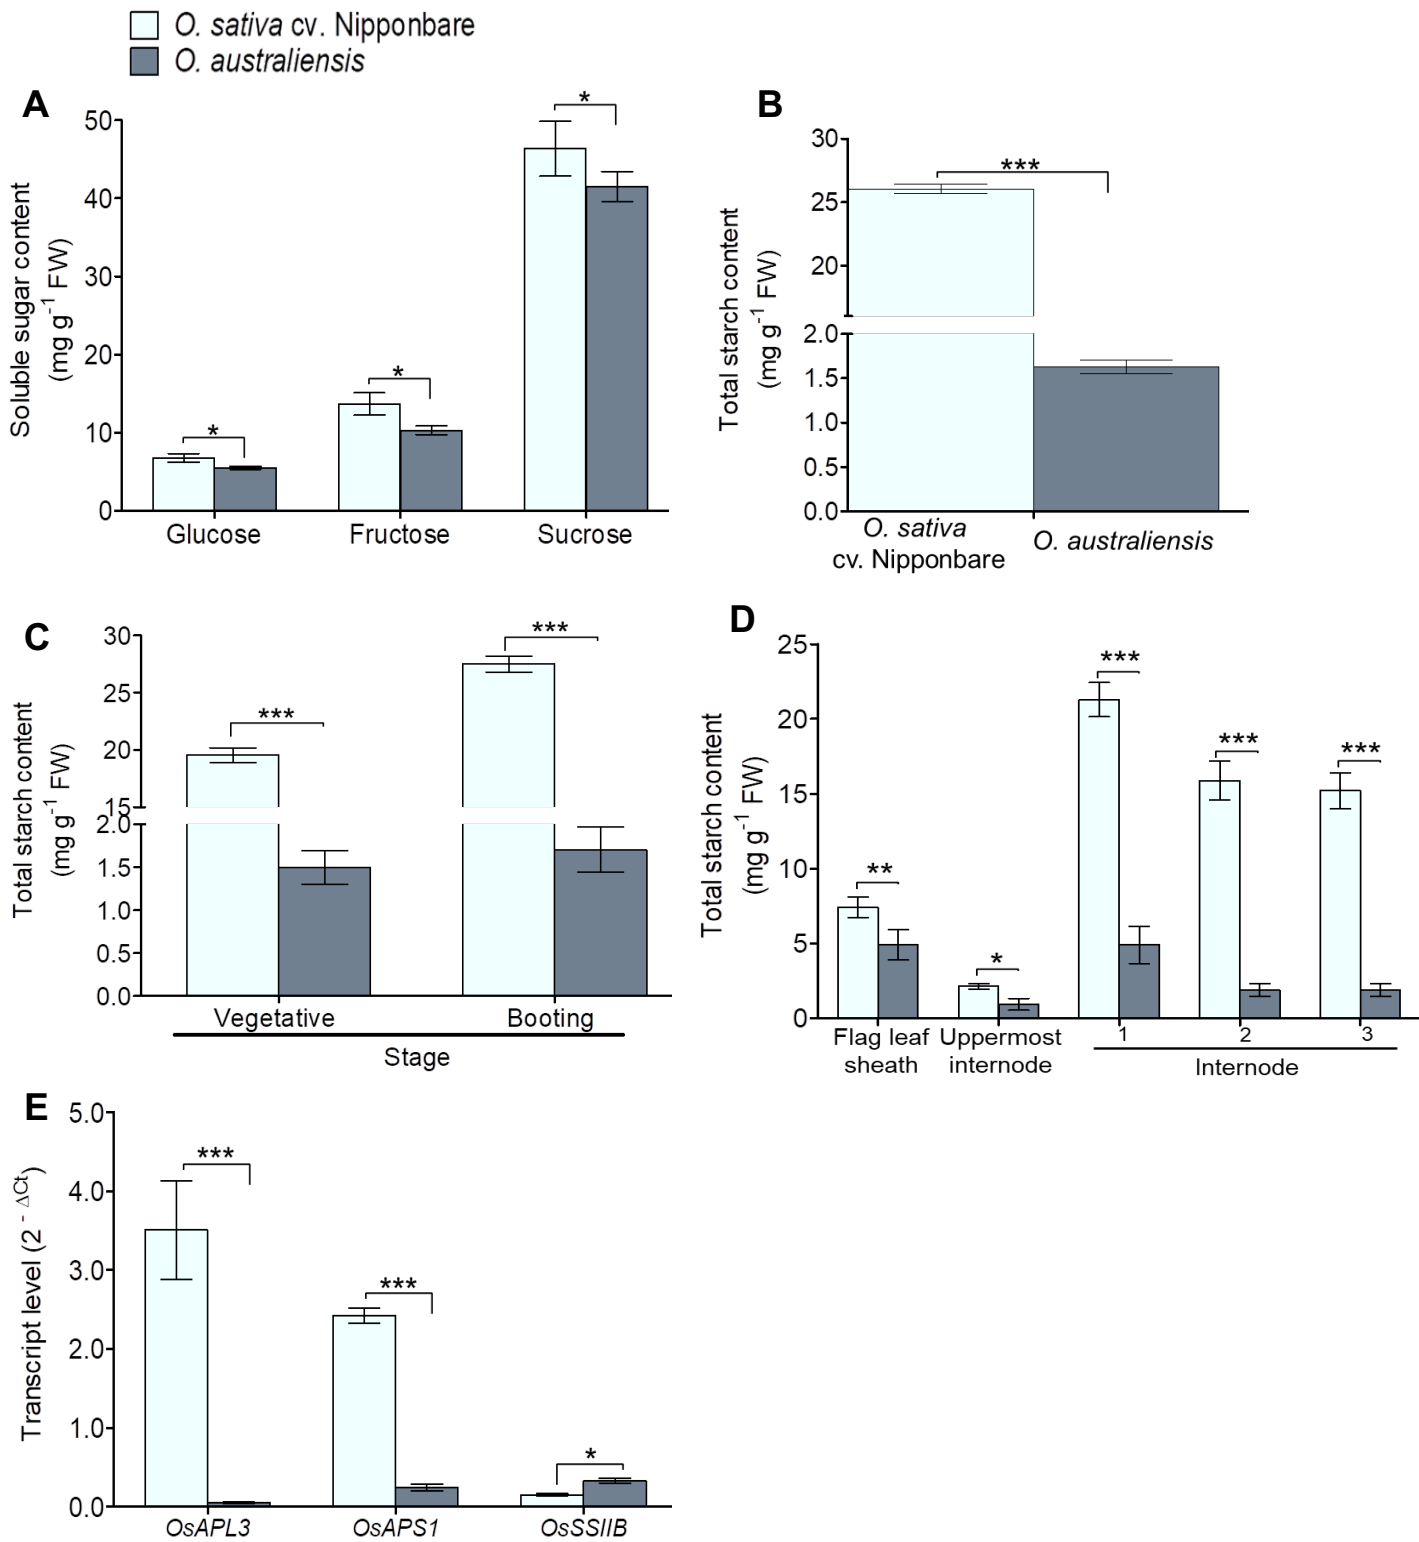

**Fig. 5. Quantification of soluble sugars and expression pattern of starch-biosynthesis genes in stems of a cultivated rice *O. sativa* cv. Nipponbare and a wild rice *O. australiensis*.**

(A-B) Glucose, fructose, and sucrose content (A), and total starch content (B) in the stem of the two species at milk-stage of grain-filling (n = 4).

(C) Quantification of total starch in the stem at vegetative and booting stage of the two species (n = 4).

(D) Starch content in flag leaf sheath and different internodes at milk-stage of grain-filling of the two species (n = 4).

(E) Transcript levels of starch-biosynthesis genes, *OsAPL3* (encoding ADP-glucose pyrophosphorylase large subunit), *OsAPS1* (encoding ADP-glucose pyrophosphorylase small subunit), and *OsSSIIB* (encoding starch synthase) in the stem of the two species at milk-stage of grain-filling (n = 3).

Data represent the mean and standard deviation (SD), and significance of differences between the genotypes was calculated using student t-test (\**P* < 0.05, \*\**P* < 0.01, \*\*\**P* < 0.001).



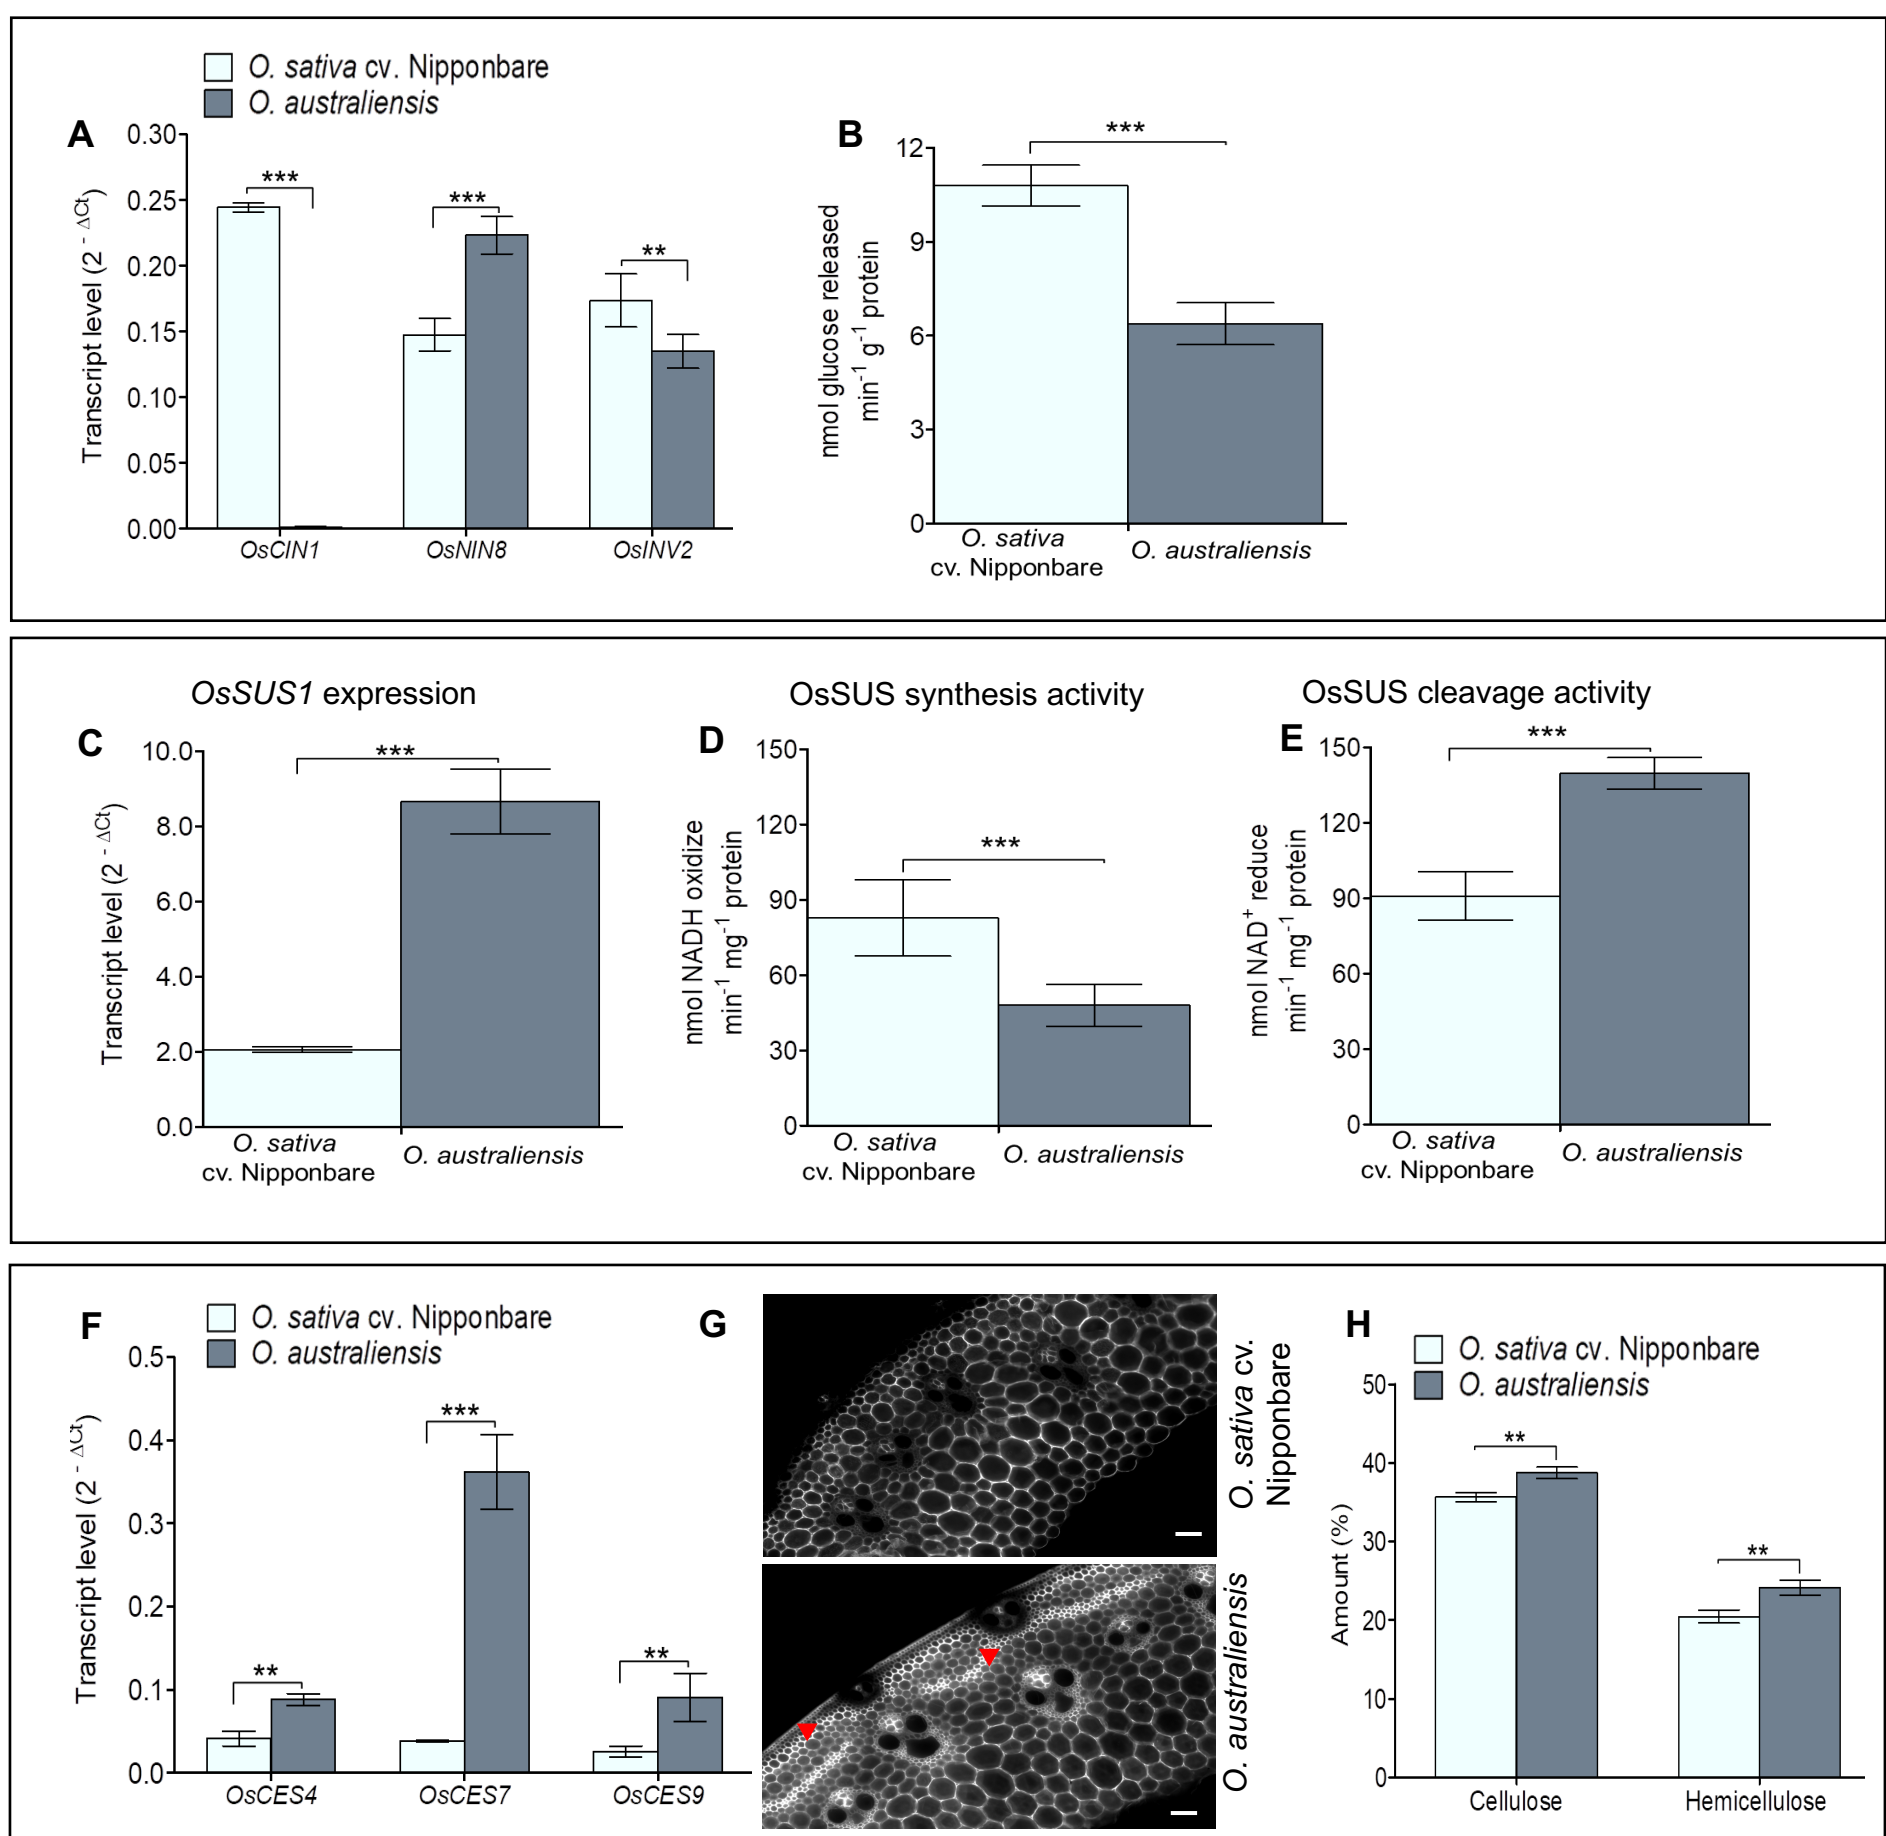

**Fig. 6. Gene expression and activities of sucrose metabolic enzymes, and structural carbohydrates levels in stem tissue of a cultivated rice *O. sativa* cv. Nipponbare and a wild rice *O. australiensis* at milk-stage of grain-filling.**

(A) Transcript levels of genes encoding cell wall invertase (*OsCIN1*), cytoplasmic invertase (*OsNIN8*), and vacuolar invertase (*OsiNV2*) (n = 3).

(B) Cell wall invertase enzyme activity (n = 4).

(C) Transcript levels of *Sucrose Synthase 1* (*OsSUS1*) (n = 3).

(D-E) *OsSUS* enzyme activity in synthesis (D) and cleavage (E) direction (n = 4).

(F) Transcript levels of *Cellulose Synthase* genes, *OsCES4*, *OsCES7*, and *OsCES9* (n = 3).

(G) Calcofluor-white staining for cellulose deposition in the transverse stem sections of the two species. Red arrowhead shows higher deposition of cellulose in *O. australiensis* stem. Scale bar represents 500 μm.

(H) Quantification of cellulose and hemicellulose in the stems of the two species (n = 4).

Data represent the mean and standard deviation (SD), and significance of differences between the genotypes was calculated using student t-test (\**P* < 0.05, \*\**P* < 0.01, \*\*\**P* < 0.001).

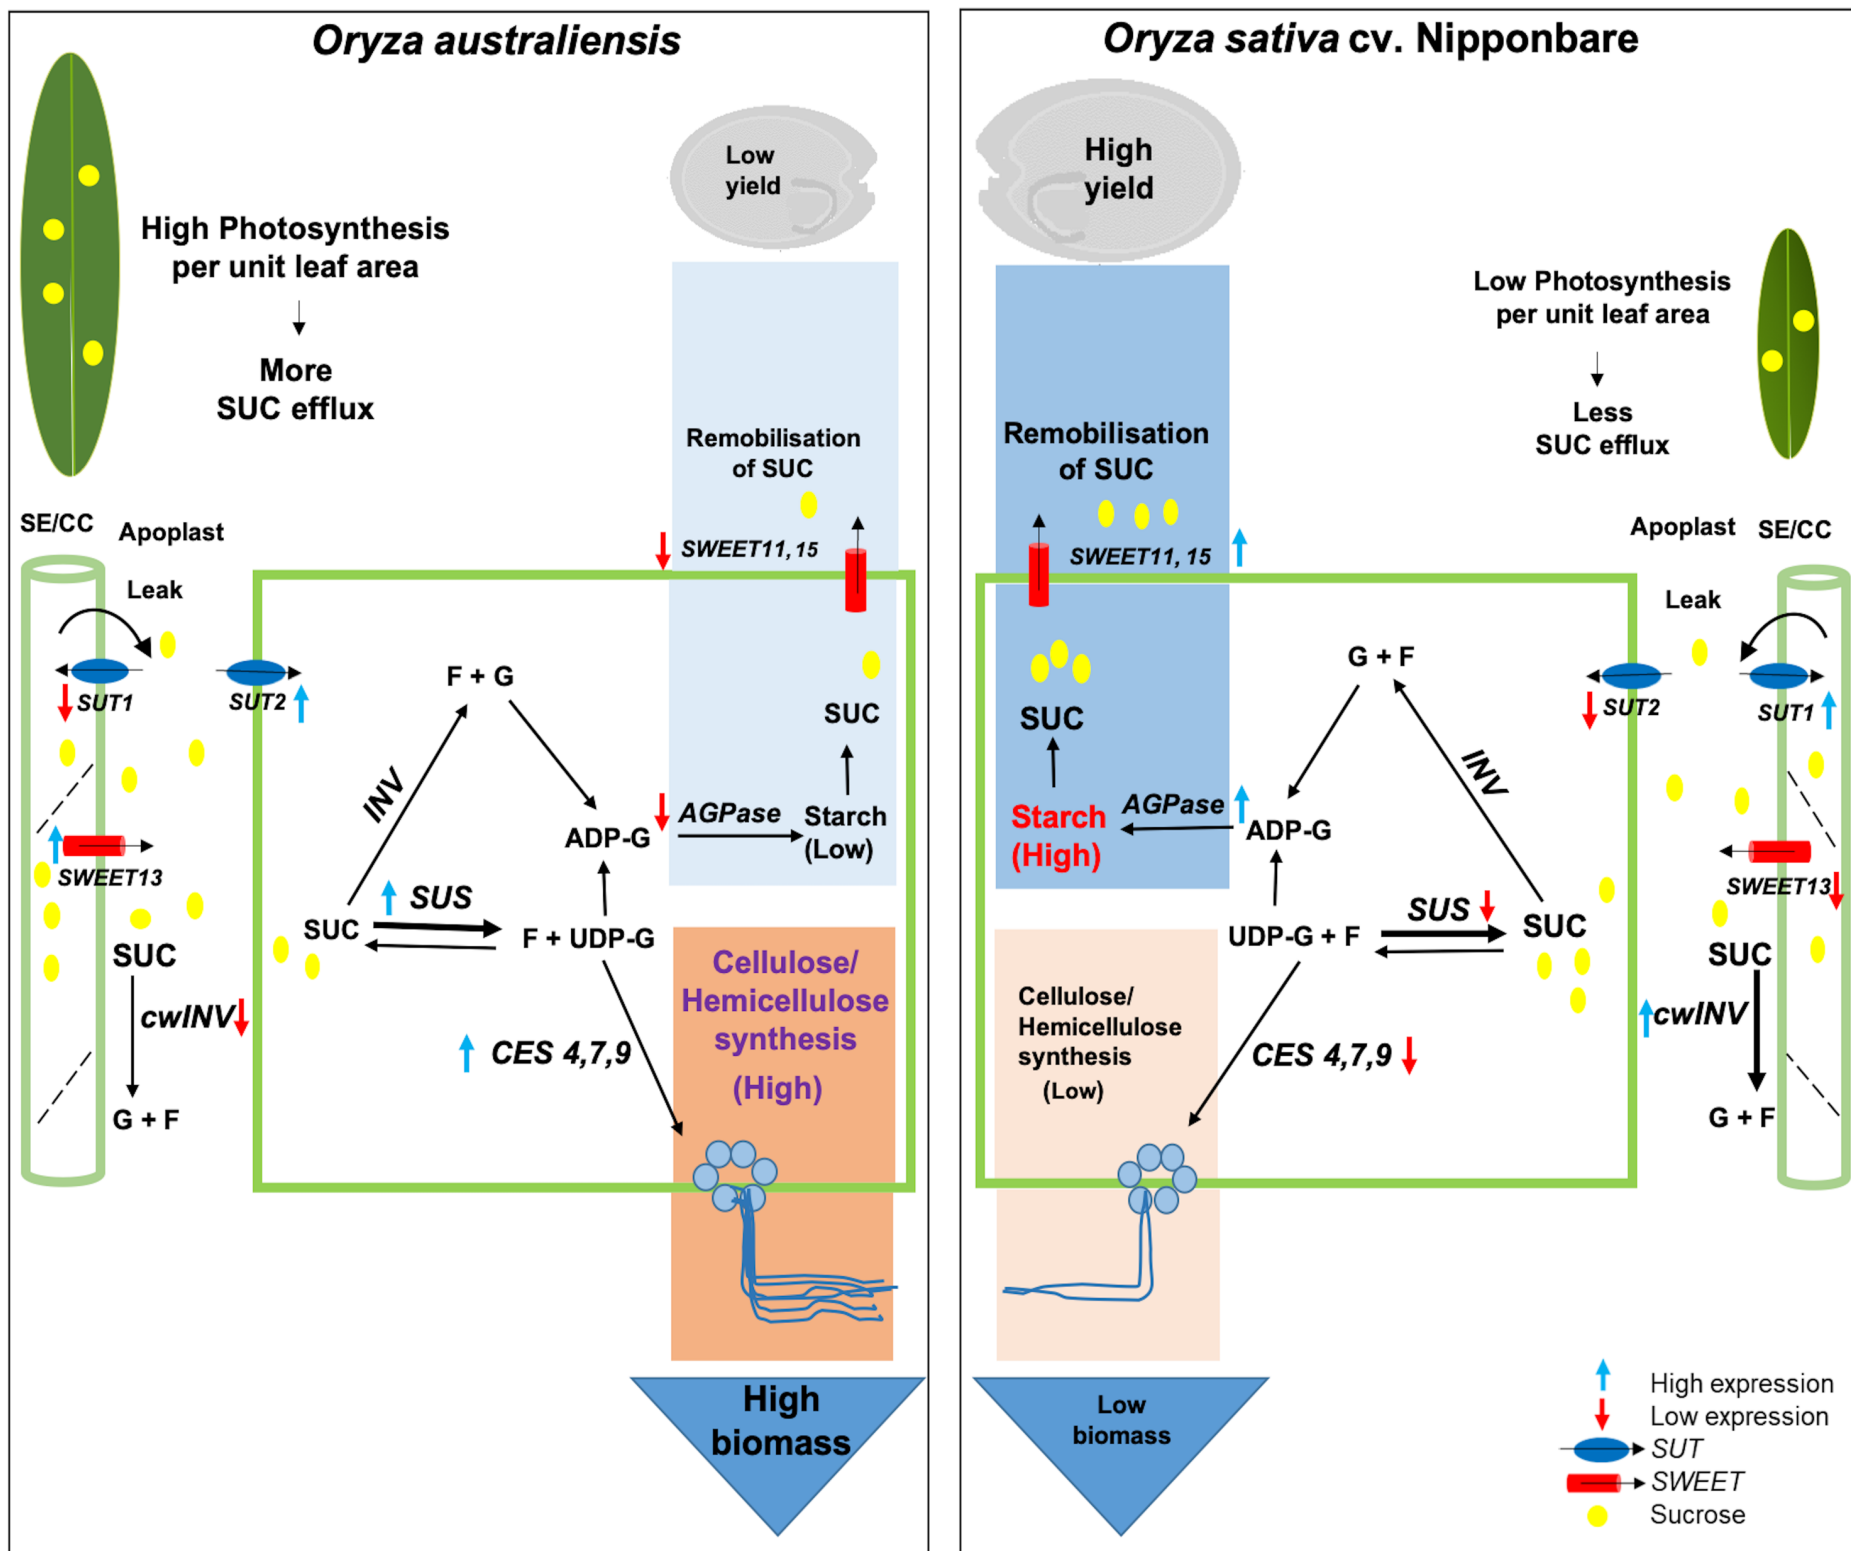

**Fig. 7. A model explaining the contribution of sucrose transport, sucrose metabolic enzyme activity, starch biosynthesis, and synthesis of structural carbohydrates towards yield and biomass differences between a wild rice *O. australiensis* and a cultivated rice *O. sativa* cv. Nipponbare.**

High leaf photosynthesis rate coupled with higher expression of selected *OsSWEET* and *OsSUT* genes mediate export of a higher amount of sucrose from a leaf in *O. australiensis* compared to *O. sativa* cv. Nipponbare. A higher amount of sucrose gets unloaded into the stem of *O. australiensis* due to the functions of *OsSWEET13* and *OsSUT2*. However, a lower expression of a gene encoding cell wall invertase (*OsCIN1*) along with the lower activity of cell wall invertase would limit the formation of glucose and fructose in the wild rice stem. Sucrose gets converted to UDP-G more efficiently in the wild rice *O. australiensis* due to higher expression of *OsSUS1* and more cleavage activity of *OsSUS* compared to the cultivated rice Nipponbare. Higher expressions of *OsCES4*, *OsCES7*, and *OsCES9*, then, promote the synthesis of cellulose in the stem of the wild rice. In contrast, higher expressions of starch-biosynthesis genes (*AGPase*, small and large subunit) lead to higher starch content in the stem of the cultivated rice. The higher synthesis activity of *OsSUS* along with the higher expression of *OsSWEET11* and *OsSWEET15* in the cultivated rice would facilitate efficient remobilisation of sucrose from stem to panicles at the grain-filling stage. SUC, sucrose (yellow colour circle); F, fructose; G, glucose; UDP-G, UDP-glucose; ADP-G, ADP-glucose; *INV*, invertase; *cwINV*, cell wall invertase; *SUS*, sucrose synthase.
